# Supplementary material for: Genomic Dissection and Diurnal Expression Analysis Reveal the Essential Roles of the PRR Gene Family in Geographical Adaptation of Soybean
Source: MDPI journal article supplement (doi:10.3390/ijms23179970), 2022-09-01
Supplement: s1 [file s1]

## **Supplementary Materials**

**This PDF file includes:**

Supplementary Figures S1–S4

Supplementary Tables S1–S4

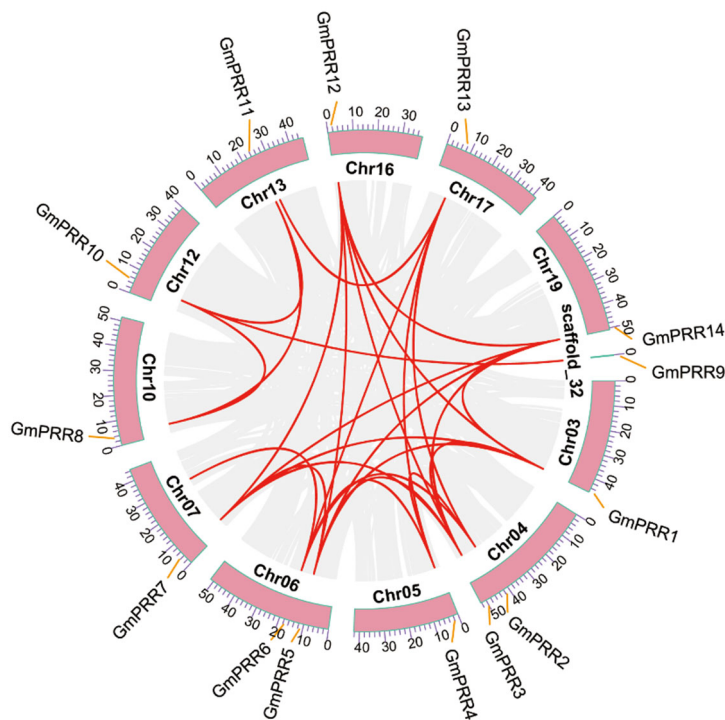

**Supplementary Figure S1. Synteny analysis and gene duplication events of *GmPRRs*.** Gray lines indicate all syntenic blocks in the soybean genome, and the red lines indicate duplicated PRR gene pairs.

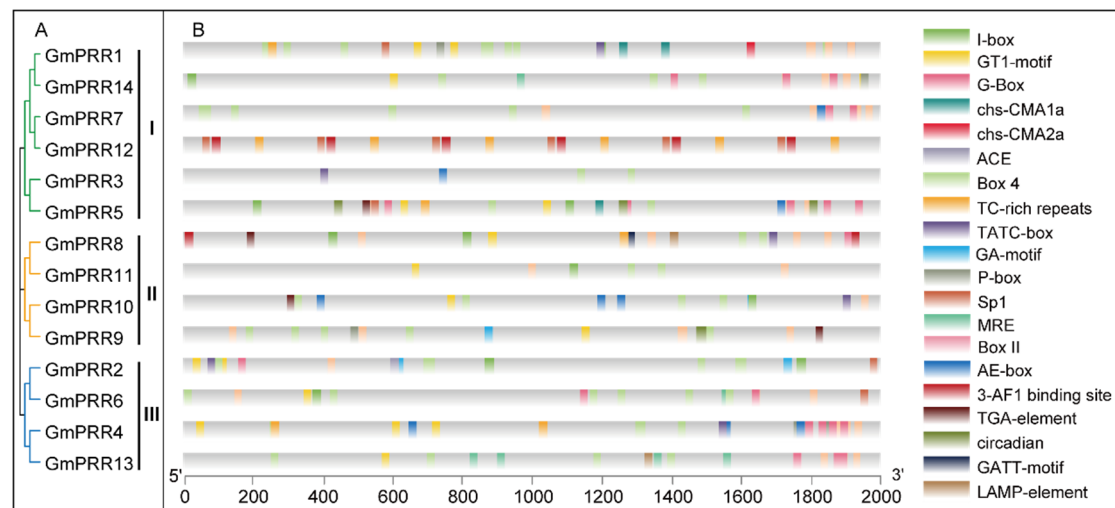

**Supplementary Figure S2. Analysis of cis-acting elements in the promoter region of *GmPRRs*.** (A) Phylogenetic tree of soybean PRR proteins. Details of groups are represented by different colors. (B) Types and positions of cis-acting elements in the 2 kb promoter region. The cis-elements are displayed in different color boxes.

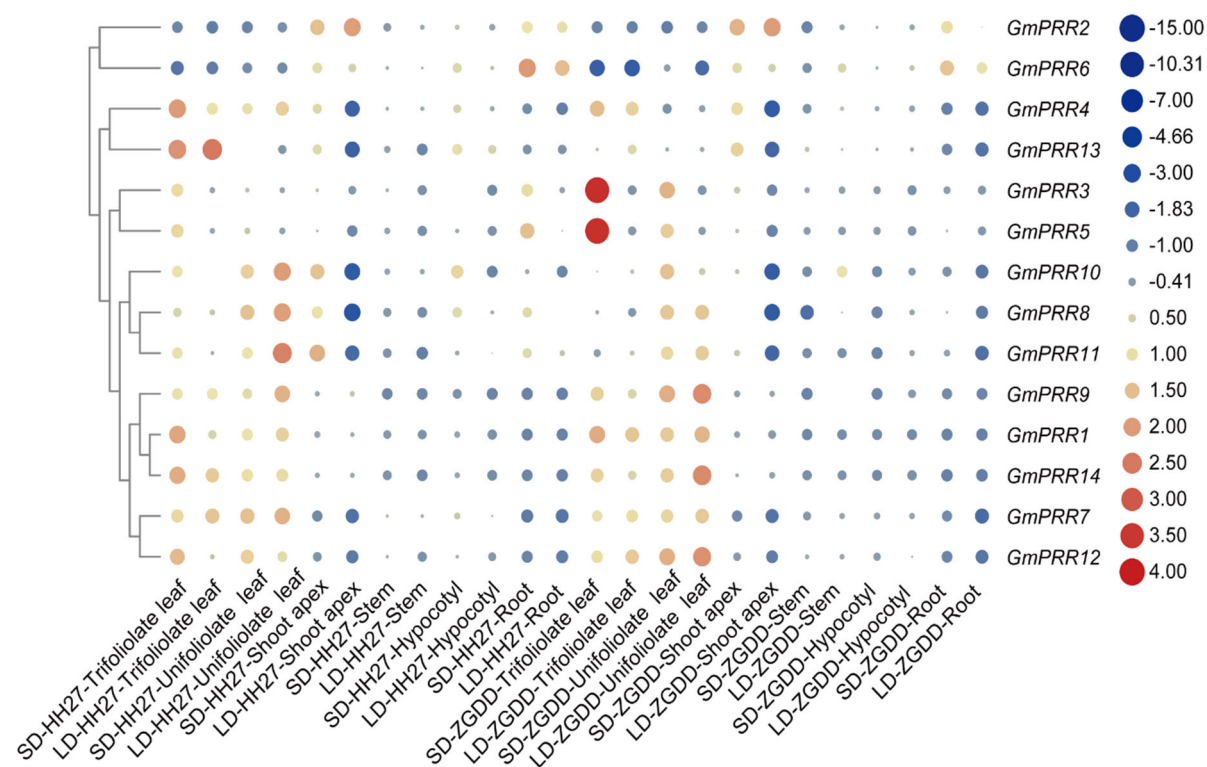

**Supplementary Figure S3. Expression profile analysis of *GmPRRs* in different tissues from soybean varieties Zigongdongdou (ZGDD) and Heihe 27 (HH27) under long-day (LD, 16: 8 h, light: dark) and short-day (SD, 12: 12 h, light: dark) treatments. Samples were collected 4 h after exposure to light.**

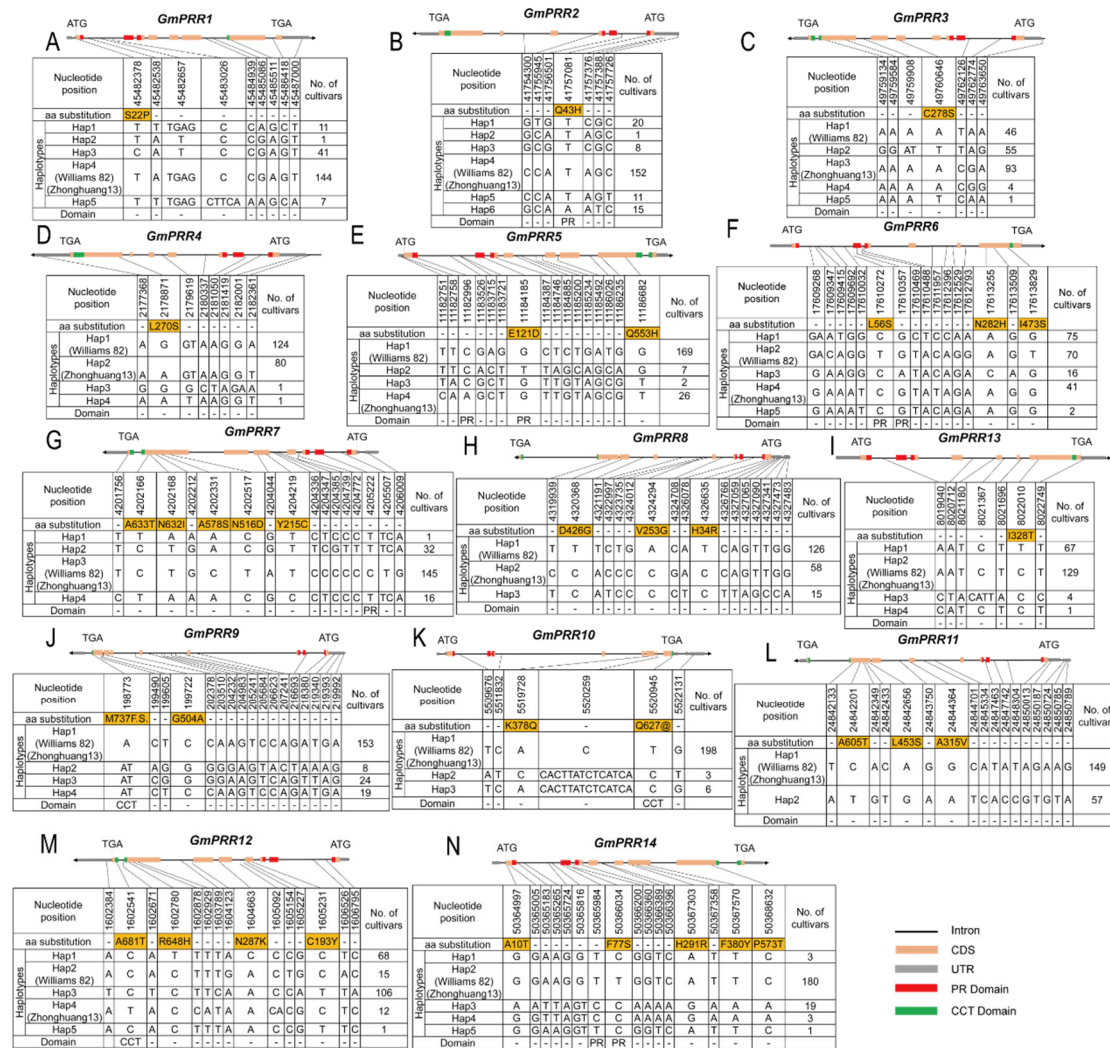

**Supplementary Table S1.** Physicochemical properties of PRR family proteins in soybean

| <b>Gene name</b> | <b>Gene ID</b>         | <b>Molecular weight/kDa</b> | <b>isoelectric point</b> | <b>Amino acid number/aa</b> | <b>Predicted Subcellular location</b> |
|------------------|------------------------|-----------------------------|--------------------------|-----------------------------|---------------------------------------|
| <i>GmPRR1</i>    | <i>Glyma.03G261300</i> | 76.5                        | 6.30                     | 692                         | Nuclear                               |
| <i>GmPRR2</i>    | <i>Glyma.04G166300</i> | 62.6                        | 5.64                     | 560                         | Nuclear                               |
| <i>GmPRR3</i>    | <i>Glyma.04G228300</i> | 76.4                        | 6.43                     | 691                         | Nuclear                               |
| <i>GmPRR4</i>    | <i>Glyma.05G025000</i> | 64.2                        | 5.55                     | 575                         | Nuclear                               |
| <i>GmPRR5</i>    | <i>Glyma.06G136600</i> | 77.1                        | 6.67                     | 700                         | Nuclear                               |
| <i>GmPRR6</i>    | <i>Glyma.06G196200</i> | 62.2                        | 5.56                     | 558                         | Nuclear                               |
| <i>GmPRR7</i>    | <i>Glyma.07G049400</i> | 79.7                        | 5.69                     | 722                         | Nuclear                               |
| <i>GmPRR8</i>    | <i>Glyma.10G048100</i> | 81.8                        | 6.77                     | 753                         | Nuclear                               |
| <i>GmPRR9</i>    | <i>Glyma.U034500</i>   | 83.3                        | 5.85                     | 765                         | Nuclear                               |
| <i>GmPRR10</i>   | <i>Glyma.12G073900</i> | 68.4                        | 6.04                     | 626                         | Nuclear                               |
| <i>GmPRR11</i>   | <i>Glyma.13G135900</i> | 81.9                        | 8.01                     | 755                         | Nuclear                               |
| <i>GmPRR12</i>   | <i>Glyma.16G018000</i> | 78.3                        | 5.70                     | 706                         | Nuclear                               |
| <i>GmPRR13</i>   | <i>Glyma.17G102200</i> | 64.7                        | 5.93                     | 579                         | Nuclear                               |
| <i>GmPRR14</i>   | <i>Glyma.19G260400</i> | 76.1                        | 6.63                     | 685                         | Nuclear                               |

**Supplementary Table S2.** The information of 207 resequencing soybean varieties

| Variety        | Region | Ecotype | MG    | Source                |
|----------------|--------|---------|-------|-----------------------|
| Beihudou       | NE     | NSP     | MG 00 | Heilongjiang, China   |
| Beifeng2       | NE     | NSP     | MG 0  | Heilongjiang, China   |
| Beifeng9       | NE     | NSP     | MG 0  | Heilongjiang, China   |
| Beifeng11      | NE     | NSP     | MG 0  | Heilongjiang, China   |
| Beidou5        | NE     | NSP     | MG 0  | Heilongjiang, China   |
| Dengke1        | NE     | NSP     | MG 0  | Inner Mongolia, China |
| Dongnong4      | NE     | NSP     | MG 0  | Heilongjiang, China   |
| Dongnong72-806 | NE     | NSP     | MG 0  | Heilongjiang, China   |
| Fengshou10     | NE     | NSP     | MG 0  | Heilongjiang, China   |
| Fengshou12     | NE     | NSP     | MG 0  | Heilongjiang, China   |
| Fengshou17     | NE     | NSP     | MG 0  | Heilongjiang, China   |
| Fengshou19     | NE     | NSP     | MG 0  | Heilongjiang, China   |
| Fengshou24     | NE     | NSP     | MG 0  | Heilongjiang, China   |
| Hefeng25       | NE     | NSP     | MG 0  | Heilongjiang, China   |
| Hefeng35       | NE     | NSP     | MG 0  | Heilongjiang, China   |
| Heihe3         | NE     | NSP     | MG 0  | Heilongjiang, China   |
| Heihe9         | NE     | NSP     | MG 0  | Heilongjiang, China   |
| Heihe18        | NE     | NSP     | MG 0  | Heilongjiang, China   |
| Heihe19        | NE     | NSP     | MG 0  | Heilongjiang, China   |
| Heihe27        | NE     | NSP     | MG 0  | Heilongjiang, China   |
| Heihe38        | NE     | NSP     | MG 0  | Heilongjiang, China   |
| Heihe51        | NE     | NSP     | MG 0  | Heilongjiang, China   |
| Heihe54        | NE     | NSP     | MG 0  | Heilongjiang, China   |
| Heilongjiang41 | NE     | NSP     | MG 0  | Heilongjiang, China   |
| Huajiang4      | NE     | NSP     | MG 0  | Heilongjiang, China   |
| Jinyuan2       | NE     | NSP     | MG 0  | Heilongjiang, China   |
| JianMGodou1    | NE     | NSP     | MG 0  | Heilongjiang, China   |
| Jingshanpu     | NE     | NSP     | MG 0  | Heilongjiang, China   |
| Kexi283        | NE     | NSP     | MG 0  | Heilongjiang, China   |
| Kangxian4      | NE     | NSP     | MG 0  | Heilongjiang, China   |
| Mancangjin     | NE     | NSP     | MG 0  | Heilongjiang, China   |
| Suinong3       | NE     | NSP     | MG 0  | Heilongjiang, China   |
| Suinong28      | NE     | NSP     | MG 0  | Heilongjiang, China   |
| Suinong41      | NE     | NSP     | MG 0  | Heilongjiang, China   |
| Mengdou30      | NE     | NSP     | MG 0  | Inner Mongolia, China |
| Hejiao6        | NE     | NSP     | MG I  | Heilongjiang, China   |
| Hejiao8        | NE     | NSP     | MG I  | Heilongjiang, China   |
| Hefeng22       | NE     | NSP     | MG I  | Heilongjiang, China   |
| Hefeng45       | NE     | NSP     | MG I  | Heilongjiang, China   |
| Hefeng47       | NE     | NSP     | MG I  | Heilongjiang, China   |
| Hefeng50       | NE     | NSP     | MG I  | Heilongjiang, China   |
| Hefeng55       | NE     | NSP     | MG I  | Heilongjiang, China   |
| Heinong16      | NE     | NSP     | MG I  | Heilongjiang, China   |
| Heinong26      | NE     | NSP     | MG I  | Heilongjiang, China   |
| Heinong33      | NE     | NSP     | MG I  | Heilongjiang, China   |
| Heinong35      | NE     | NSP     | MG I  | Heilongjiang, China   |
| Heinong37      | NE     | NSP     | MG I  | Heilongjiang, China   |
| Heinong43      | NE     | NSP     | MG I  | Heilongjiang, China   |
| Heinong44      | NE     | NSP     | MG I  | Heilongjiang, China   |

| Variety          | Region | Ecotype | MG     | Source              |
|------------------|--------|---------|--------|---------------------|
| Heinong48        | NE     | NSP     | MG I   | Heilongjiang, China |
| Kenfeng16        | NE     | NSP     | MG I   | Heilongjiang, China |
| Suinong8         | NE     | NSP     | MG I   | Heilongjiang, China |
| Suinong10        | NE     | NSP     | MG I   | Heilongjiang, China |
| Changnong4       | NE     | NSP     | MG I   | Jilin, China        |
| Miquanhuangdou   | NW     | NSP     | MG I   | Xinjiang, China     |
| Changjihuangdou  | NW     | NSP     | MG I   | Xinjiang, China     |
| Zhi2             | NE     | NSP     | MG I   | Jilin, China        |
| Zihua4           | NE     | NSP     | MG II  | Heilongjiang, China |
| Changnong5       | NE     | NSP     | MG II  | Jilin, China        |
| Fengdihuang      | NE     | NSP     | MG II  | Jilin, China        |
| Huangbaozhu      | NE     | NSP     | MG II  | Jilin, China        |
| Jilin3           | NE     | NSP     | MG II  | Jilin, China        |
| Jilin6           | NE     | NSP     | MG II  | Jilin, China        |
| Jilin13          | NE     | NSP     | MG II  | Jilin, China        |
| Jilin20          | NE     | NSP     | MG II  | Jilin, China        |
| Jilin30          | NE     | NSP     | MG II  | Jilin, China        |
| Jilin47          | NE     | NSP     | MG II  | Jilin, China        |
| Jiti5            | NE     | NSP     | MG II  | Jilin, China        |
| Jiyu57           | NE     | NSP     | MG II  | Jilin, China        |
| Jiunong9         | NE     | NSP     | MG II  | Jilin, China        |
| Jiunong22        | NE     | NSP     | MG II  | Jilin, China        |
| Xiaojinhuang1    | NE     | NSP     | MG II  | Jilin, China        |
| Zaofeng1         | NE     | NSP     | MG II  | Jilin, China        |
| Jiti1            | NE     | NSP     | MG II  | Liaoning, China     |
| Jin6604-24       | NE     | NSP     | MG II  | Liaoning, China     |
| Kaiyu3           | NE     | NSP     | MG II  | Liaoning, China     |
| Kaiyu8           | NE     | NSP     | MG II  | Liaoning, China     |
| Kaiyu10          | NE     | NSP     | MG II  | Liaoning, China     |
| Tiefeng3         | NE     | NSP     | MG II  | Liaoning, China     |
| Tiefeng8         | NE     | NSP     | MG II  | Liaoning, China     |
| Tiefeng18        | NE     | NSP     | MG II  | Liaoning, China     |
| Tiefeng19        | NE     | NSP     | MG II  | Liaoning, China     |
| Tiefeng20        | NE     | NSP     | MG II  | Liaoning, China     |
| Fushou           | NE     | NSP     | MG II  | Liaoning, China     |
| Jindou2          | NE     | NSP     | MG II  | Shanxi, China       |
| Jindou3          | NE     | NSP     | MG II  | Shanxi, China       |
| Dandou2          | NE     | NSP     | MG III | Liaoning, China     |
| Dandou4          | NE     | NSP     | MG III | Liaoning, China     |
| Jin8-14          | NE     | NSP     | MG III | Liaoning, China     |
| Jindou33         | NE     | NSP     | MG III | Liaoning, China     |
| Liaodou15        | NE     | NSP     | MG III | Liaoning, China     |
| Tiefeng31        | NE     | NSP     | MG III | Liaoning, China     |
| Dandou1          | NE     | NSP     | MG IV  | Liaoning, China     |
| Tiefeng29        | NE     | NSP     | MG IV  | Liaoning, China     |
| Changpingqingdou | NE     | NSP     | MG IV  | Beijing, China      |
| Huairouhuangdou  | HHH    | NSP     | MG III | Beijing, China      |
| Qunyingdou       | HHH    | NSP     | MG III | Hebei, China        |
| Zhonghuang30     | HHH    | NSP     | MG III | Beijing, China      |
| Zhonghuang35     | HHH    | NSP     | MG III | Beijing, China      |

| Variety                   | Region | Ecotype | MG     | Source           |
|---------------------------|--------|---------|--------|------------------|
| Jindou19                  | HHH    | NSP     | MG III | Shanxi, China    |
| Jindou21                  | HHH    | NSP     | MG III | Shanxi, China    |
| Jindou25                  | HHH    | NSP     | MG III | Shanxi, China    |
| Bahong1                   | HHH    | NSP     | MG IV  | Hebei, China     |
| Youbian30                 | HHH    | NSP     | MG IV  | Beijing, China   |
| Jindou23                  | HHH    | NSP     | MG IV  | Shanxi, China    |
| Hai94                     | HHH    | NSP     | MG V   | Shanxi, China    |
| Jidou7                    | HHH    | HSU     | MG II  | Hebei, China     |
| Ludou11                   | HHH    | HSU     | MG II  | Shandong, China  |
| Qihuang10                 | HHH    | HSU     | MG II  | Shandong, China  |
| Henanzaofeng1             | HHH    | HSU     | MG II  | Henan, China     |
| Kefeng6                   | HHH    | HSU     | MG III | Beijing, China   |
| Handou5                   | HHH    | HSU     | MG III | Hebei, China     |
| Jidou12                   | HHH    | HSU     | MG III | Hebei, China     |
| Jidou17                   | HHH    | HSU     | MG III | Hebei, China     |
| Zhongdou19                | HHH    | HSU     | MG III | Henan, China     |
| Zhonghuang13              | HHH    | HSU     | MG III | Beijing, China   |
| Zhonghuang37              | HHH    | HSU     | MG III | Beijing, China   |
| Hedou13                   | HHH    | HSU     | MG III | Shandong, China  |
| Heze Niumaohuang          | HHH    | HSU     | MG III | Shandong, China  |
| Ludou4                    | HHH    | HSU     | MG III | Shandong, China  |
| Yanhuang1                 | HHH    | HSU     | MG III | Shandong, China  |
| Yidu Pingdinghuang        | HHH    | HSU     | MG III | Shandong, China  |
| Wenfeng5                  | HHH    | HSU     | MG III | Shandong, China  |
| Wenfeng7                  | HHH    | HSU     | MG III | Shandong, China  |
| Shangcai Ercaopingdingshi | HHH    | HSU     | MG III | Henan, China     |
| Weiqingdou                | HHH    | HSU     | MG III | Henan, China     |
| Zhengzhou135              | HHH    | HSU     | MG III | Henan, China     |
| Naiyinheidou              | HHH    | HSU     | MG IV  | Hebei, China     |
| Haiyang Pawanqing         | HHH    | HSU     | MG IV  | Shandong, China  |
| Yuejin4                   | HHH    | HSU     | MG IV  | Shandong, China  |
| Yudou2                    | HHH    | HSU     | MG IV  | Henan, China     |
| Yudou8                    | HHH    | HSU     | MG IV  | Henan, China     |
| Yudou22                   | HHH    | HSU     | MG IV  | Henan, China     |
| Zheng92116                | HHH    | HSU     | MG IV  | Henan, China     |
| Xudou1                    | HHH    | HSU     | MG IV  | Jiangsu, China   |
| Xudou2                    | HHH    | HSU     | MG IV  | Jiangsu, China   |
| Xudou5                    | HHH    | HSU     | MG IV  | Jiangsu, China   |
| Xudou9                    | HHH    | HSU     | MG IV  | Jiangsu, China   |
| 58-161                    | HHH    | HSU     | MG IV  | Jiangsu, China   |
| Wandou24                  | HHH    | HSU     | MG IV  | Anhui, China     |
| Yuejin5                   | HHH    | HSU     | MG V   | Shandong, China  |
| Taixingheidou             | SC     | SSP     | MG I   | Jiangsu, China   |
| Edou8                     | SC     | SSP     | MG I   | Hubei, China     |
| Aijiaozao                 | SC     | SSP     | MG II  | Hubei, China     |
| Tianlong1                 | SC     | SSP     | MG II  | Hubei, China     |
| Guichun1                  | SC     | SSP     | MG III | Guangxi, China   |
| Heibiqing                 | SC     | SSP     | MG III | Guangdong, China |
| Zigongqingpidou           | SC     | SSP     | MG IV  | Sichuan, China   |
| Liuyuehuang               | SC     | SSP     | MG IV  | Guizhou, China   |

| Variety              | Region | Ecotype | MG      | Source           |
|----------------------|--------|---------|---------|------------------|
| Qiandou6             | SC     | SSP     | MG IV   | Guizhou, China   |
| Jinjiang Daqingren   | SC     | SSP     | MG IV   | Fujian, China    |
| Taiwan75 (Green 75)  | SC     | SSP     |         | Taiwan, China    |
| Guichun8             | SC     | SSP     | MG IV   | Guangxi, China   |
| Baihuadou            | SC     | SSP     | MG IV   | Guangdong, China |
| Yuling Dahuangdou    | SC     | SSP     | MG V    | Guangxi, China   |
| Juhuangdadou         | SC     | SSP     | MG VI   | Guangdong, China |
| Wuhua Siyuehuang     | SC     | SSP     | MG VI   | Guangdong, China |
| Shangyu Kanshanbai   | SC     | SSP     | MG VIII | Zhejiang, China  |
| Zhechun3             | SC     | SSP     | MG VIII | Zhejiang, China  |
| Chengliu Niumaohuang | SC     | HSU     | MG IV   | Henan, China     |
| Fengcheng Niupidou   | SC     | SSU     | MG II   | Jiangxi, China   |
| Yunyizao             | SC     | SSU     | MG IV   | Hunan, China     |
| Dian86-4             | SC     | SSU     | MG IV   | Yunnan, China    |
| Jinning Dahuangdou   | SC     | SSU     | MG IV   | Yunnan, China    |
| Suidaohuang          | SC     | SSU     | MG V    | Jiangsu, China   |
| Edou2                | SC     | SSU     | MG V    | Hubei, China     |
| Houzimao             | SC     | SSU     | MG V    | Hubei, China     |
| Nannong493-1         | SC     | SSU     | MG VI   | Jiangsu, China   |
| Suxie1               | SC     | SSU     | MG VI   | Jiangsu, China   |
| Bayueqing            | SC     | SSU     | MG VI   | Hunan, China     |
| Jingda332            | SC     | SSU     | MG VII  | Jiangsu, China   |
| Pingguohuangdou      | SC     | SSU     | MG VII  | Guangxi, China   |
| Nandou12             | SC     | SSU     | MG VIII | Sichuan, China   |
| Yangchunqingdou      | SC     | SAU     | MG VI   | Guangdong, China |
| Lanxi Daqingdou      | SC     | SAU     | MG VIII | Zhejiang, China  |
| Zigongdongdou        | SC     | SAU     | MG VIII | Sichuan, China   |
| Shangrao Daqingsi    | SC     | SAU     | MG VIII | Jiangxi, China   |
| Qiudou1              | SC     | SAU     | MG VIII | Hunan, China     |
| Merit                | USA    | USA     | MG 0    | USA              |
| Clay                 | USA    | USA     | MG 0    | USA              |
| McCall               | USA    | USA     | MG 0    | USA              |
| Norman               | USA    | USA     | MG 0    | USA              |
| Portage              | USA    | USA     | MG 0    | USA              |
| Wilkin               | USA    | USA     | MG 0    | USA              |
| Chippewa64           | USA    | USA     | MG I    | USA              |
| Evans                | USA    | USA     | MG I    | USA              |
| Amsoy                | USA    | USA     | MG II   | USA              |
| Amsoy71              | USA    | USA     | MG II   | USA              |
| Beeson               | USA    | USA     | MG II   | USA              |
| Corsoy               | USA    | USA     | MG II   | USA              |
| Hark                 | USA    | USA     | MG II   | USA              |
| Harosoy63            | USA    | USA     | MG II   | USA              |
| Wayne                | USA    | USA     | MG III  | USA              |
| Clark                | USA    | USA     | MG IV   | USA              |
| Cutler               | USA    | USA     | MG IV   | USA              |
| Bedford              | USA    | USA     | MG V    | USA              |
| Dare                 | USA    | USA     | MG V    | USA              |
| Forrest              | USA    | USA     | MG V    | USA              |
| Centennial           | USA    | USA     | MG VI   | USA              |

| Variety | Region | Ecotype | MG      | Source |
|---------|--------|---------|---------|--------|
| Hood    | USA    | USA     | MG VI   | USA    |
| Tracy   | USA    | USA     | MG VI   | USA    |
| Bragg   | USA    | USA     | MG VII  | USA    |
| Braxton | USA    | USA     | MG VII  | USA    |
| Dowling | USA    | USA     | MG VII  | USA    |
| Jupiter | USA    | USA     | MG VIII | USA    |

\* MG: Maturity Group; HHH: Huang-Huai-Hai; NE: Northeast China; NW: Northwest China; SC: South China. NSP: Northern Spring Planting ecotype; HSU: Huang-Huai-Hai Summer Planting ecotype; SSP: Southern Spring Planting ecotype; SSU: Southern Summer Planting ecotype; SAU: Southern Autumn Planting ecotype.

**Supplementary Table S3.** The haplotype combinations of *GmPRRs* among the 207 soybean varieties

| Variety      | <i>GmPRR1</i>               | <i>GmPRR2</i>               | <i>GmPRR3</i>               | <i>GmPRR4</i>               | <i>GmPRR5</i>               | <i>GmPRR6</i>               | <i>GmPRR7</i>               | <i>GmPRR8</i>               | <i>GmPRR9</i>               | <i>GmPRR10</i>               | <i>GmPRR11</i>               | <i>GmPRR12</i>               | <i>GmPRR13</i>               | <i>GmPRR14</i>               |
|--------------|-----------------------------|-----------------------------|-----------------------------|-----------------------------|-----------------------------|-----------------------------|-----------------------------|-----------------------------|-----------------------------|------------------------------|------------------------------|------------------------------|------------------------------|------------------------------|
| Huajiang4    | <i>GmPRR1</i> <sup>H1</sup> | <i>GmPRR2</i> <sup>H4</sup> | <i>GmPRR3</i> <sup>H1</sup> | <i>GmPRR4</i> <sup>H1</sup> | <i>GmPRR5</i> <sup>H1</sup> | <i>GmPRR6</i> <sup>H1</sup> | <i>GmPRR7</i> <sup>H2</sup> | <i>GmPRR8</i> <sup>H1</sup> | <i>GmPRR9</i> <sup>H1</sup> | <i>GmPRR10</i> <sup>H1</sup> | <i>GmPRR11</i> <sup>H1</sup> | <i>GmPRR12</i> <sup>H1</sup> | /                            | <i>GmPRR14</i> <sup>H2</sup> |
| Hefeng25     | <i>GmPRR1</i> <sup>H1</sup> | <i>GmPRR2</i> <sup>H4</sup> | <i>GmPRR3</i> <sup>H1</sup> | <i>GmPRR4</i> <sup>H1</sup> | <i>GmPRR5</i> <sup>H1</sup> | /                           | <i>GmPRR7</i> <sup>H2</sup> | <i>GmPRR8</i> <sup>H1</sup> | <i>GmPRR9</i> <sup>H1</sup> | <i>GmPRR10</i> <sup>H1</sup> | <i>GmPRR11</i> <sup>H1</sup> | <i>GmPRR12</i> <sup>H1</sup> | <i>GmPRR13</i> <sup>H2</sup> | <i>GmPRR14</i> <sup>H2</sup> |
| Suinong14    | <i>GmPRR1</i> <sup>H1</sup> | <i>GmPRR2</i> <sup>H4</sup> | <i>GmPRR3</i> <sup>H1</sup> | <i>GmPRR4</i> <sup>H1</sup> | <i>GmPRR5</i> <sup>H1</sup> | <i>GmPRR6</i> <sup>H1</sup> | <i>GmPRR7</i> <sup>H2</sup> | <i>GmPRR8</i> <sup>H1</sup> | <i>GmPRR9</i> <sup>H1</sup> | <i>GmPRR10</i> <sup>H1</sup> | <i>GmPRR11</i> <sup>H1</sup> | <i>GmPRR12</i> <sup>H1</sup> | <i>GmPRR13</i> <sup>H2</sup> | <i>GmPRR14</i> <sup>H2</sup> |
| Suinong28    | <i>GmPRR1</i> <sup>H1</sup> | <i>GmPRR2</i> <sup>H4</sup> | <i>GmPRR3</i> <sup>H1</sup> | <i>GmPRR4</i> <sup>H1</sup> | <i>GmPRR5</i> <sup>H1</sup> | <i>GmPRR6</i> <sup>H1</sup> | <i>GmPRR7</i> <sup>H2</sup> | <i>GmPRR8</i> <sup>H1</sup> | <i>GmPRR9</i> <sup>H1</sup> | <i>GmPRR10</i> <sup>H1</sup> | <i>GmPRR11</i> <sup>H1</sup> | <i>GmPRR12</i> <sup>H1</sup> | <i>GmPRR13</i> <sup>H2</sup> | <i>GmPRR14</i> <sup>H2</sup> |
| Beifeng11    | <i>GmPRR1</i> <sup>H1</sup> | <i>GmPRR2</i> <sup>H4</sup> | <i>GmPRR3</i> <sup>H1</sup> | <i>GmPRR4</i> <sup>H1</sup> | <i>GmPRR5</i> <sup>H1</sup> | <i>GmPRR6</i> <sup>H1</sup> | <i>GmPRR7</i> <sup>H2</sup> | <i>GmPRR8</i> <sup>H1</sup> | <i>GmPRR9</i> <sup>H1</sup> | <i>GmPRR10</i> <sup>H1</sup> | <i>GmPRR11</i> <sup>H1</sup> | <i>GmPRR12</i> <sup>H3</sup> | <i>GmPRR13</i> <sup>H2</sup> | <i>GmPRR14</i> <sup>H2</sup> |
| Beifeng9     | <i>GmPRR1</i> <sup>H1</sup> | <i>GmPRR2</i> <sup>H4</sup> | <i>GmPRR3</i> <sup>H1</sup> | <i>GmPRR4</i> <sup>H1</sup> | <i>GmPRR5</i> <sup>H1</sup> | <i>GmPRR6</i> <sup>H2</sup> | <i>GmPRR7</i> <sup>H3</sup> | <i>GmPRR8</i> <sup>H1</sup> | <i>GmPRR9</i> <sup>H1</sup> | <i>GmPRR10</i> <sup>H1</sup> | <i>GmPRR11</i> <sup>H1</sup> | <i>GmPRR12</i> <sup>H1</sup> | <i>GmPRR13</i> <sup>H1</sup> | <i>GmPRR14</i> <sup>H2</sup> |
| Heihe9       | <i>GmPRR1</i> <sup>H1</sup> | <i>GmPRR2</i> <sup>H4</sup> | <i>GmPRR3</i> <sup>H1</sup> | <i>GmPRR4</i> <sup>H1</sup> | <i>GmPRR5</i> <sup>H1</sup> | <i>GmPRR6</i> <sup>H2</sup> | <i>GmPRR7</i> <sup>H2</sup> | <i>GmPRR8</i> <sup>H1</sup> | <i>GmPRR9</i> <sup>H1</sup> | <i>GmPRR10</i> <sup>H1</sup> | <i>GmPRR11</i> <sup>H1</sup> | <i>GmPRR12</i> <sup>H1</sup> | <i>GmPRR13</i> <sup>H2</sup> | <i>GmPRR14</i> <sup>H2</sup> |
| Heinong35    | <i>GmPRR1</i> <sup>H1</sup> | <i>GmPRR2</i> <sup>H4</sup> | <i>GmPRR3</i> <sup>H1</sup> | <i>GmPRR4</i> <sup>H1</sup> | <i>GmPRR5</i> <sup>H1</sup> | <i>GmPRR6</i> <sup>H2</sup> | <i>GmPRR7</i> <sup>H2</sup> | <i>GmPRR8</i> <sup>H1</sup> | <i>GmPRR9</i> <sup>H1</sup> | <i>GmPRR10</i> <sup>H1</sup> | <i>GmPRR11</i> <sup>H1</sup> | <i>GmPRR12</i> <sup>H1</sup> | <i>GmPRR13</i> <sup>H2</sup> | /                            |
| Jilin47      | <i>GmPRR1</i> <sup>H1</sup> | <i>GmPRR2</i> <sup>H4</sup> | <i>GmPRR3</i> <sup>H1</sup> | <i>GmPRR4</i> <sup>H1</sup> | <i>GmPRR5</i> <sup>H2</sup> | <i>GmPRR6</i> <sup>H2</sup> | <i>GmPRR7</i> <sup>H2</sup> | <i>GmPRR8</i> <sup>H1</sup> | <i>GmPRR9</i> <sup>H1</sup> | <i>GmPRR10</i> <sup>H1</sup> | <i>GmPRR11</i> <sup>H1</sup> | <i>GmPRR12</i> <sup>H1</sup> | <i>GmPRR13</i> <sup>H2</sup> | <i>GmPRR14</i> <sup>H2</sup> |
| Beidou5      | <i>GmPRR1</i> <sup>H1</sup> | <i>GmPRR2</i> <sup>H4</sup> | <i>GmPRR3</i> <sup>H3</sup> | /                           | <i>GmPRR5</i> <sup>H1</sup> | <i>GmPRR6</i> <sup>H1</sup> | <i>GmPRR7</i> <sup>H2</sup> | <i>GmPRR8</i> <sup>H1</sup> | <i>GmPRR9</i> <sup>H1</sup> | <i>GmPRR10</i> <sup>H1</sup> | <i>GmPRR11</i> <sup>H1</sup> | <i>GmPRR12</i> <sup>H1</sup> | <i>GmPRR13</i> <sup>H2</sup> | <i>GmPRR14</i> <sup>H2</sup> |
| Dwngeke1     | <i>GmPRR1</i> <sup>H1</sup> | <i>GmPRR2</i> <sup>H4</sup> | <i>GmPRR3</i> <sup>H3</sup> | <i>GmPRR4</i> <sup>H1</sup> | <i>GmPRR5</i> <sup>H1</sup> | <i>GmPRR6</i> <sup>H1</sup> | <i>GmPRR7</i> <sup>H2</sup> | <i>GmPRR8</i> <sup>H1</sup> | <i>GmPRR9</i> <sup>H1</sup> | <i>GmPRR10</i> <sup>H1</sup> | <i>GmPRR11</i> <sup>H1</sup> | <i>GmPRR12</i> <sup>H1</sup> | <i>GmPRR13</i> <sup>H2</sup> | <i>GmPRR14</i> <sup>H2</sup> |
| Zhonghuang35 | <i>GmPRR1</i> <sup>H2</sup> | <i>GmPRR2</i> <sup>H4</sup> | /                           | <i>GmPRR4</i> <sup>H1</sup> | <i>GmPRR5</i> <sup>H1</sup> | <i>GmPRR6</i> <sup>H2</sup> | /                           | /                           | <i>GmPRR9</i> <sup>H1</sup> | <i>GmPRR10</i> <sup>H1</sup> | <i>GmPRR11</i> <sup>H1</sup> | /                            | /                            | <i>GmPRR14</i> <sup>H2</sup> |
| Suinong10    | <i>GmPRR1</i> <sup>H3</sup> | <i>GmPRR2</i> <sup>H1</sup> | <i>GmPRR3</i> <sup>H1</sup> | <i>GmPRR4</i> <sup>H1</sup> | <i>GmPRR5</i> <sup>H1</sup> | <i>GmPRR6</i> <sup>H1</sup> | <i>GmPRR7</i> <sup>H3</sup> | <i>GmPRR8</i> <sup>H2</sup> | <i>GmPRR9</i> <sup>H1</sup> | <i>GmPRR10</i> <sup>H1</sup> | <i>GmPRR11</i> <sup>H1</sup> | <i>GmPRR12</i> <sup>H3</sup> | <i>GmPRR13</i> <sup>H1</sup> | <i>GmPRR14</i> <sup>H2</sup> |
| Tiefeng3     | <i>GmPRR1</i> <sup>H3</sup> | <i>GmPRR2</i> <sup>H1</sup> | <i>GmPRR3</i> <sup>H2</sup> | <i>GmPRR4</i> <sup>H1</sup> | <i>GmPRR5</i> <sup>H1</sup> | <i>GmPRR6</i> <sup>H2</sup> | <i>GmPRR7</i> <sup>H3</sup> | <i>GmPRR8</i> <sup>H1</sup> | <i>GmPRR9</i> <sup>H1</sup> | <i>GmPRR10</i> <sup>H1</sup> | <i>GmPRR11</i> <sup>H1</sup> | <i>GmPRR12</i> <sup>H3</sup> | <i>GmPRR13</i> <sup>H1</sup> | <i>GmPRR14</i> <sup>H2</sup> |
| Tiefeng 19   | <i>GmPRR1</i> <sup>H3</sup> | <i>GmPRR2</i> <sup>H1</sup> | <i>GmPRR3</i> <sup>H2</sup> | <i>GmPRR4</i> <sup>H1</sup> | <i>GmPRR5</i> <sup>H1</sup> | <i>GmPRR6</i> <sup>H2</sup> | <i>GmPRR7</i> <sup>H3</sup> | <i>GmPRR8</i> <sup>H1</sup> | <i>GmPRR9</i> <sup>H1</sup> | <i>GmPRR10</i> <sup>H1</sup> | <i>GmPRR11</i> <sup>H1</sup> | <i>GmPRR12</i> <sup>H3</sup> | <i>GmPRR13</i> <sup>H1</sup> | <i>GmPRR14</i> <sup>H2</sup> |
| Jilin3       | <i>GmPRR1</i> <sup>H3</sup> | <i>GmPRR2</i> <sup>H1</sup> | /                           | <i>GmPRR4</i> <sup>H1</sup> | <i>GmPRR5</i> <sup>H1</sup> | <i>GmPRR6</i> <sup>H2</sup> | <i>GmPRR7</i> <sup>H3</sup> | <i>GmPRR8</i> <sup>H1</sup> | <i>GmPRR9</i> <sup>H1</sup> | <i>GmPRR10</i> <sup>H1</sup> | <i>GmPRR11</i> <sup>H1</sup> | <i>GmPRR12</i> <sup>H3</sup> | <i>GmPRR13</i> <sup>H2</sup> | <i>GmPRR14</i> <sup>H2</sup> |
| Jilin4       | <i>GmPRR1</i> <sup>H3</sup> | <i>GmPRR2</i> <sup>H1</sup> | <i>GmPRR3</i> <sup>H2</sup> | <i>GmPRR4</i> <sup>H2</sup> | <i>GmPRR5</i> <sup>H1</sup> | <i>GmPRR6</i> <sup>H2</sup> | <i>GmPRR7</i> <sup>H3</sup> | <i>GmPRR8</i> <sup>H1</sup> | <i>GmPRR9</i> <sup>H1</sup> | <i>GmPRR10</i> <sup>H1</sup> | <i>GmPRR11</i> <sup>H1</sup> | <i>GmPRR12</i> <sup>H3</sup> | <i>GmPRR13</i> <sup>H2</sup> | <i>GmPRR14</i> <sup>H2</sup> |
| clay         | <i>GmPRR1</i> <sup>H3</sup> | <i>GmPRR2</i> <sup>H3</sup> | <i>GmPRR3</i> <sup>H2</sup> | <i>GmPRR4</i> <sup>H1</sup> | <i>GmPRR5</i> <sup>H1</sup> | <i>GmPRR6</i> <sup>H1</sup> | <i>GmPRR7</i> <sup>H3</sup> | <i>GmPRR8</i> <sup>H2</sup> | <i>GmPRR9</i> <sup>H1</sup> | <i>GmPRR10</i> <sup>H1</sup> | <i>GmPRR11</i> <sup>H1</sup> | <i>GmPRR12</i> <sup>H2</sup> | <i>GmPRR13</i> <sup>H2</sup> | <i>GmPRR14</i> <sup>H2</sup> |
| PI548531     | <i>GmPRR1</i> <sup>H3</sup> | <i>GmPRR2</i> <sup>H3</sup> | <i>GmPRR3</i> <sup>H2</sup> | <i>GmPRR4</i> <sup>H1</sup> | <i>GmPRR5</i> <sup>H1</sup> | <i>GmPRR6</i> <sup>H2</sup> | <i>GmPRR7</i> <sup>H3</sup> | <i>GmPRR8</i> <sup>H1</sup> | <i>GmPRR9</i> <sup>H1</sup> | <i>GmPRR10</i> <sup>H1</sup> | <i>GmPRR11</i> <sup>H1</sup> | <i>GmPRR12</i> <sup>H3</sup> | <i>GmPRR13</i> <sup>H2</sup> | <i>GmPRR14</i> <sup>H2</sup> |
| Jin8-14      | <i>GmPRR1</i> <sup>H3</sup> | <i>GmPRR2</i> <sup>H3</sup> | <i>GmPRR3</i> <sup>H3</sup> | <i>GmPRR4</i> <sup>H1</sup> | <i>GmPRR5</i> <sup>H1</sup> | <i>GmPRR6</i> <sup>H1</sup> | <i>GmPRR7</i> <sup>H3</sup> | <i>GmPRR8</i> <sup>H2</sup> | <i>GmPRR9</i> <sup>H3</sup> | <i>GmPRR10</i> <sup>H1</sup> | <i>GmPRR11</i> <sup>H2</sup> | <i>GmPRR12</i> <sup>H2</sup> | <i>GmPRR13</i> <sup>H1</sup> | <i>GmPRR14</i> <sup>H2</sup> |
| Heinong44    | <i>GmPRR1</i> <sup>H3</sup> | <i>GmPRR2</i> <sup>H4</sup> | <i>GmPRR3</i> <sup>H1</sup> | <i>GmPRR4</i> <sup>H1</sup> | <i>GmPRR5</i> <sup>H1</sup> | <i>GmPRR6</i> <sup>H1</sup> | <i>GmPRR7</i> <sup>H3</sup> | <i>GmPRR8</i> <sup>H1</sup> | <i>GmPRR9</i> <sup>H1</sup> | <i>GmPRR10</i> <sup>H1</sup> | <i>GmPRR11</i> <sup>H1</sup> | <i>GmPRR12</i> <sup>H1</sup> | <i>GmPRR13</i> <sup>H1</sup> | <i>GmPRR14</i> <sup>H2</sup> |
| Jidou7       | <i>GmPRR1</i> <sup>H3</sup> | <i>GmPRR2</i> <sup>H4</sup> | <i>GmPRR3</i> <sup>H1</sup> | <i>GmPRR4</i> <sup>H2</sup> | <i>GmPRR5</i> <sup>H1</sup> | <i>GmPRR6</i> <sup>H2</sup> | <i>GmPRR7</i> <sup>H2</sup> | <i>GmPRR8</i> <sup>H1</sup> | <i>GmPRR9</i> <sup>H1</sup> | <i>GmPRR10</i> <sup>H1</sup> | /                            | <i>GmPRR12</i> <sup>H2</sup> | <i>GmPRR13</i> <sup>H1</sup> | <i>GmPRR14</i> <sup>H2</sup> |
| Wayne        | <i>GmPRR1</i> <sup>H3</sup> | <i>GmPRR2</i> <sup>H4</sup> | <i>GmPRR3</i> <sup>H1</sup> | <i>GmPRR4</i> <sup>H2</sup> | <i>GmPRR5</i> <sup>H1</sup> | <i>GmPRR6</i> <sup>H2</sup> | <i>GmPRR7</i> <sup>H3</sup> | <i>GmPRR8</i> <sup>H1</sup> | <i>GmPRR9</i> <sup>H1</sup> | <i>GmPRR10</i> <sup>H1</sup> | <i>GmPRR11</i> <sup>H1</sup> | <i>GmPRR12</i> <sup>H2</sup> | <i>GmPRR13</i> <sup>H2</sup> | <i>GmPRR14</i> <sup>H2</sup> |

| Variety            | GmPRR1               | GmPRR2               | GmPRR3               | GmPRR4               | GmPRR5               | GmPRR6               | GmPRR7               | GmPRR8               | GmPRR9               | GmPRR10               | GmPRR11               | GmPRR12               | GmPRR13               | GmPRR14               |
|--------------------|----------------------|----------------------|----------------------|----------------------|----------------------|----------------------|----------------------|----------------------|----------------------|-----------------------|-----------------------|-----------------------|-----------------------|-----------------------|
| Qihuang10          | GmPRR1 <sup>H3</sup> | GmPRR2 <sup>H4</sup> | GmPRR3 <sup>H1</sup> | GmPRR4 <sup>H2</sup> | GmPRR5 <sup>H1</sup> | GmPRR6 <sup>H2</sup> | GmPRR7 <sup>H3</sup> | GmPRR8 <sup>H2</sup> | GmPRR9 <sup>H1</sup> | GmPRR10 <sup>H1</sup> | GmPRR11 <sup>H1</sup> | GmPRR12 <sup>H3</sup> | GmPRR13 <sup>H2</sup> | GmPRR14 <sup>H2</sup> |
| Clark              | GmPRR1 <sup>H3</sup> | GmPRR2 <sup>H4</sup> | GmPRR3 <sup>H2</sup> | GmPRR4 <sup>H1</sup> | GmPRR5 <sup>H1</sup> | GmPRR6 <sup>H2</sup> | GmPRR7 <sup>H3</sup> | GmPRR8 <sup>H1</sup> | GmPRR9 <sup>H1</sup> | GmPRR10 <sup>H1</sup> | GmPRR11 <sup>H1</sup> | GmPRR12 <sup>H2</sup> | GmPRR13 <sup>H2</sup> | GmPRR14 <sup>H2</sup> |
| Kaiyu3             | GmPRR1 <sup>H3</sup> | GmPRR2 <sup>H4</sup> | GmPRR3 <sup>H2</sup> | GmPRR4 <sup>H1</sup> | GmPRR5 <sup>H1</sup> | GmPRR6 <sup>H2</sup> | GmPRR7 <sup>H2</sup> | GmPRR8 <sup>H1</sup> | GmPRR9 <sup>H1</sup> | GmPRR10 <sup>H1</sup> | GmPRR11 <sup>H1</sup> | GmPRR12 <sup>H3</sup> | GmPRR13 <sup>H2</sup> | GmPRR14 <sup>H2</sup> |
| Jindou1            | GmPRR1 <sup>H3</sup> | GmPRR2 <sup>H4</sup> | GmPRR3 <sup>H2</sup> | GmPRR4 <sup>H1</sup> | GmPRR5 <sup>H1</sup> | GmPRR6 <sup>H3</sup> | GmPRR7 <sup>H3</sup> | GmPRR8 <sup>H2</sup> | GmPRR9 <sup>H3</sup> | GmPRR10 <sup>H1</sup> | GmPRR11 <sup>H1</sup> | GmPRR12 <sup>H3</sup> | GmPRR13 <sup>H2</sup> | /                     |
| Hai94              | GmPRR1 <sup>H3</sup> | GmPRR2 <sup>H4</sup> | GmPRR3 <sup>H2</sup> | GmPRR4 <sup>H1</sup> | GmPRR5 <sup>H1</sup> | GmPRR6 <sup>H3</sup> | GmPRR7 <sup>H3</sup> | GmPRR8 <sup>H2</sup> | GmPRR9 <sup>H3</sup> | GmPRR10 <sup>H1</sup> | GmPRR11 <sup>H1</sup> | GmPRR12 <sup>H3</sup> | GmPRR13 <sup>H2</sup> | GmPRR14 <sup>H3</sup> |
| Jidou12            | GmPRR1 <sup>H3</sup> | GmPRR2 <sup>H4</sup> | GmPRR3 <sup>H2</sup> | GmPRR4 <sup>H2</sup> | GmPRR5 <sup>H2</sup> | GmPRR6 <sup>H4</sup> | GmPRR7 <sup>H3</sup> | GmPRR8 <sup>H1</sup> | GmPRR9 <sup>H3</sup> | GmPRR10 <sup>H1</sup> | GmPRR11 <sup>H1</sup> | GmPRR12 <sup>H4</sup> | GmPRR13 <sup>H2</sup> | GmPRR14 <sup>H2</sup> |
| Suxie1             | GmPRR1 <sup>H3</sup> | GmPRR2 <sup>H4</sup> | GmPRR3 <sup>H3</sup> | GmPRR4 <sup>H1</sup> | /                    | GmPRR6 <sup>H1</sup> | GmPRR7 <sup>H3</sup> | GmPRR8 <sup>H1</sup> | GmPRR9 <sup>H4</sup> | GmPRR10 <sup>H1</sup> | GmPRR11 <sup>H2</sup> | GmPRR12 <sup>H4</sup> | GmPRR13 <sup>H2</sup> | GmPRR14 <sup>H2</sup> |
| Jinyuan2           | GmPRR1 <sup>H3</sup> | GmPRR2 <sup>H4</sup> | GmPRR3 <sup>H3</sup> | GmPRR4 <sup>H1</sup> | GmPRR5 <sup>H1</sup> | GmPRR6 <sup>H1</sup> | GmPRR7 <sup>H3</sup> | GmPRR8 <sup>H2</sup> | GmPRR9 <sup>H1</sup> | GmPRR10 <sup>H1</sup> | GmPRR11 <sup>H1</sup> | GmPRR12 <sup>H1</sup> | GmPRR13 <sup>H2</sup> | GmPRR14 <sup>H2</sup> |
| Jilin20            | GmPRR1 <sup>H3</sup> | GmPRR2 <sup>H4</sup> | GmPRR3 <sup>H3</sup> | GmPRR4 <sup>H1</sup> | GmPRR5 <sup>H1</sup> | GmPRR6 <sup>H2</sup> | GmPRR7 <sup>H2</sup> | GmPRR8 <sup>H1</sup> | GmPRR9 <sup>H1</sup> | GmPRR10 <sup>H1</sup> | GmPRR11 <sup>H1</sup> | GmPRR12 <sup>H3</sup> | GmPRR13 <sup>H1</sup> | GmPRR14 <sup>H2</sup> |
| Changnong5         | GmPRR1 <sup>H3</sup> | GmPRR2 <sup>H4</sup> | GmPRR3 <sup>H3</sup> | GmPRR4 <sup>H1</sup> | GmPRR5 <sup>H1</sup> | GmPRR6 <sup>H2</sup> | GmPRR7 <sup>H2</sup> | GmPRR8 <sup>H1</sup> | GmPRR9 <sup>H1</sup> | GmPRR10 <sup>H1</sup> | GmPRR11 <sup>H1</sup> | GmPRR12 <sup>H3</sup> | GmPRR13 <sup>H1</sup> | GmPRR14 <sup>H2</sup> |
| Changnong4         | GmPRR1 <sup>H3</sup> | GmPRR2 <sup>H4</sup> | GmPRR3 <sup>H3</sup> | GmPRR4 <sup>H1</sup> | GmPRR5 <sup>H1</sup> | GmPRR6 <sup>H2</sup> | GmPRR7 <sup>H3</sup> | GmPRR8 <sup>H1</sup> | GmPRR9 <sup>H1</sup> | GmPRR10 <sup>H1</sup> | GmPRR11 <sup>H1</sup> | GmPRR12 <sup>H3</sup> | GmPRR13 <sup>H1</sup> | GmPRR14 <sup>H2</sup> |
| Jilin30            | GmPRR1 <sup>H3</sup> | GmPRR2 <sup>H4</sup> | GmPRR3 <sup>H3</sup> | GmPRR4 <sup>H1</sup> | GmPRR5 <sup>H1</sup> | GmPRR6 <sup>H2</sup> | GmPRR7 <sup>H3</sup> | GmPRR8 <sup>H1</sup> | GmPRR9 <sup>H1</sup> | GmPRR10 <sup>H1</sup> | GmPRR11 <sup>H1</sup> | GmPRR12 <sup>H3</sup> | GmPRR13 <sup>H1</sup> | GmPRR14 <sup>H2</sup> |
| Zheng92116         | GmPRR1 <sup>H3</sup> | GmPRR2 <sup>H4</sup> | GmPRR3 <sup>H3</sup> | GmPRR4 <sup>H2</sup> | GmPRR5 <sup>H1</sup> | GmPRR6 <sup>H1</sup> | GmPRR7 <sup>H3</sup> | /                    | GmPRR9 <sup>H1</sup> | GmPRR10 <sup>H1</sup> | GmPRR11 <sup>H2</sup> | GmPRR12 <sup>H3</sup> | GmPRR13 <sup>H1</sup> | GmPRR14 <sup>H2</sup> |
| Edou8              | GmPRR1 <sup>H3</sup> | GmPRR2 <sup>H4</sup> | GmPRR3 <sup>H3</sup> | GmPRR4 <sup>H2</sup> | GmPRR5 <sup>H1</sup> | GmPRR6 <sup>H1</sup> | GmPRR7 <sup>H3</sup> | GmPRR8 <sup>H1</sup> | GmPRR9 <sup>H3</sup> | GmPRR10 <sup>H1</sup> | GmPRR11 <sup>H2</sup> | GmPRR12 <sup>H1</sup> | GmPRR13 <sup>H2</sup> | GmPRR14 <sup>H2</sup> |
| Handou5            | GmPRR1 <sup>H3</sup> | GmPRR2 <sup>H4</sup> | GmPRR3 <sup>H3</sup> | GmPRR4 <sup>H2</sup> | GmPRR5 <sup>H1</sup> | GmPRR6 <sup>H2</sup> | GmPRR7 <sup>H3</sup> | GmPRR8 <sup>H1</sup> | GmPRR9 <sup>H1</sup> | GmPRR10 <sup>H1</sup> | GmPRR11 <sup>H2</sup> | GmPRR12 <sup>H2</sup> | GmPRR13 <sup>H2</sup> | GmPRR14 <sup>H2</sup> |
| Haiyangpamanqing   | GmPRR1 <sup>H3</sup> | GmPRR2 <sup>H4</sup> | GmPRR3 <sup>H3</sup> | GmPRR4 <sup>H2</sup> | GmPRR5 <sup>H2</sup> | GmPRR6 <sup>H2</sup> | GmPRR7 <sup>H3</sup> | GmPRR8 <sup>H2</sup> | GmPRR9 <sup>H4</sup> | GmPRR10 <sup>H1</sup> | GmPRR11 <sup>H2</sup> | GmPRR12 <sup>H3</sup> | GmPRR13 <sup>H3</sup> | GmPRR14 <sup>H2</sup> |
| Zhengzhou135       | GmPRR1 <sup>H3</sup> | GmPRR2 <sup>H4</sup> | GmPRR3 <sup>H3</sup> | GmPRR4 <sup>H2</sup> | GmPRR5 <sup>H4</sup> | GmPRR6 <sup>H2</sup> | GmPRR7 <sup>H3</sup> | GmPRR8 <sup>H2</sup> | GmPRR9 <sup>H1</sup> | GmPRR10 <sup>H1</sup> | GmPRR11 <sup>H1</sup> | GmPRR12 <sup>H1</sup> | GmPRR13 <sup>H2</sup> | GmPRR14 <sup>H2</sup> |
| Aijiaozao          | GmPRR1 <sup>H3</sup> | GmPRR2 <sup>H4</sup> | GmPRR3 <sup>H3</sup> | GmPRR4 <sup>H2</sup> | GmPRR5 <sup>H4</sup> | GmPRR6 <sup>H3</sup> | GmPRR7 <sup>H2</sup> | GmPRR8 <sup>H1</sup> | GmPRR9 <sup>H1</sup> | GmPRR10 <sup>H1</sup> | GmPRR11 <sup>H2</sup> | /                     | GmPRR13 <sup>H2</sup> | GmPRR14 <sup>H2</sup> |
| Zhonghuang37       | GmPRR1 <sup>H3</sup> | GmPRR2 <sup>H4</sup> | GmPRR3 <sup>H3</sup> | GmPRR4 <sup>H2</sup> | GmPRR5 <sup>H4</sup> | GmPRR6 <sup>H4</sup> | GmPRR7 <sup>H3</sup> | GmPRR8 <sup>H2</sup> | GmPRR9 <sup>H1</sup> | GmPRR10 <sup>H1</sup> | GmPRR11 <sup>H1</sup> | GmPRR12 <sup>H1</sup> | GmPRR13 <sup>H2</sup> | GmPRR14 <sup>H2</sup> |
| Shangyukanshangbai | GmPRR1 <sup>H3</sup> | GmPRR2 <sup>H4</sup> | GmPRR3 <sup>H3</sup> | GmPRR4 <sup>H2</sup> | GmPRR5 <sup>H4</sup> | GmPRR6 <sup>H4</sup> | GmPRR7 <sup>H4</sup> | GmPRR8 <sup>H2</sup> | GmPRR9 <sup>H2</sup> | GmPRR10 <sup>H1</sup> | GmPRR11 <sup>H2</sup> | GmPRR12 <sup>H3</sup> | GmPRR13 <sup>H2</sup> | GmPRR14 <sup>H3</sup> |
| Yudou22            | GmPRR1 <sup>H3</sup> | GmPRR2 <sup>H4</sup> | GmPRR3 <sup>H3</sup> | GmPRR4 <sup>H2</sup> | /                    | GmPRR6 <sup>H1</sup> | GmPRR7 <sup>H3</sup> | GmPRR8 <sup>H2</sup> | GmPRR9 <sup>H1</sup> | GmPRR10 <sup>H1</sup> | GmPRR11 <sup>H2</sup> | GmPRR12 <sup>H4</sup> | GmPRR13 <sup>H1</sup> | GmPRR14 <sup>H2</sup> |
| Wandou24           | GmPRR1 <sup>H3</sup> | GmPRR2 <sup>H4</sup> | /                    | GmPRR4 <sup>H2</sup> | /                    | /                    | GmPRR7 <sup>H3</sup> | GmPRR8 <sup>H2</sup> | GmPRR9 <sup>H1</sup> | GmPRR10 <sup>H1</sup> | /                     | GmPRR12 <sup>H3</sup> | GmPRR13 <sup>H2</sup> | GmPRR14 <sup>H2</sup> |
| Nannong493-1       | GmPRR1 <sup>H3</sup> | GmPRR2 <sup>H5</sup> | GmPRR3 <sup>H3</sup> | GmPRR4 <sup>H1</sup> | GmPRR5 <sup>H2</sup> | GmPRR6 <sup>H1</sup> | GmPRR7 <sup>H3</sup> | GmPRR8 <sup>H1</sup> | GmPRR9 <sup>H2</sup> | GmPRR10 <sup>H1</sup> | GmPRR11 <sup>H2</sup> | GmPRR12 <sup>H1</sup> | GmPRR13 <sup>H2</sup> | GmPRR14 <sup>H2</sup> |
| Zhongdou19         | GmPRR1 <sup>H3</sup> | GmPRR2 <sup>H5</sup> | GmPRR3 <sup>H3</sup> | GmPRR4 <sup>H2</sup> | GmPRR5 <sup>H2</sup> | GmPRR6 <sup>H2</sup> | GmPRR7 <sup>H2</sup> | GmPRR8 <sup>H3</sup> | GmPRR9 <sup>H1</sup> | GmPRR10 <sup>H1</sup> | GmPRR11 <sup>H2</sup> | GmPRR12 <sup>H4</sup> | GmPRR13 <sup>H2</sup> | GmPRR14 <sup>H2</sup> |

| Variety           | GmPRR1               | GmPRR2               | GmPRR3               | GmPRR4               | GmPRR5               | GmPRR6               | GmPRR7               | GmPRR8               | GmPRR9               | GmPRR10               | GmPRR11               | GmPRR12               | GmPRR13               | GmPRR14               |
|-------------------|----------------------|----------------------|----------------------|----------------------|----------------------|----------------------|----------------------|----------------------|----------------------|-----------------------|-----------------------|-----------------------|-----------------------|-----------------------|
| Zhechun3          | GmPRR1 <sup>H3</sup> | GmPRR2 <sup>H5</sup> | GmPRR3 <sup>H4</sup> | GmPRR4 <sup>H2</sup> | GmPRR5 <sup>H4</sup> | GmPRR6 <sup>H4</sup> | GmPRR7 <sup>H3</sup> | GmPRR8 <sup>H1</sup> | GmPRR9 <sup>H4</sup> | GmPRR10 <sup>H1</sup> | GmPRR11 <sup>H2</sup> | GmPRR12 <sup>H1</sup> | GmPRR13 <sup>H1</sup> | GmPRR14 <sup>H2</sup> |
| Yidupingdinghuang | GmPRR1 <sup>H3</sup> | GmPRR2 <sup>H6</sup> | GmPRR3 <sup>H2</sup> | GmPRR4 <sup>H3</sup> | GmPRR5 <sup>H1</sup> | GmPRR6 <sup>H2</sup> | /                    | GmPRR8 <sup>H1</sup> | /                    | GmPRR10 <sup>H1</sup> | GmPRR11 <sup>H2</sup> | GmPRR12 <sup>H1</sup> | GmPRR13 <sup>H2</sup> | GmPRR14 <sup>H2</sup> |
| Fengshouhuang1    | GmPRR1 <sup>H3</sup> | GmPRR2 <sup>H6</sup> | GmPRR3 <sup>H2</sup> | GmPRR4 <sup>H2</sup> | GmPRR5 <sup>H1</sup> | GmPRR6 <sup>H2</sup> | /                    | GmPRR8 <sup>H3</sup> | GmPRR9 <sup>H3</sup> | GmPRR10 <sup>H1</sup> | GmPRR11 <sup>H2</sup> | GmPRR12 <sup>H1</sup> | GmPRR13 <sup>H3</sup> | GmPRR14 <sup>H2</sup> |
| Jindou21          | GmPRR1 <sup>H3</sup> | GmPRR2 <sup>H6</sup> | GmPRR3 <sup>H2</sup> | GmPRR4 <sup>H1</sup> | GmPRR5 <sup>H1</sup> | GmPRR6 <sup>H2</sup> | GmPRR7 <sup>H3</sup> | GmPRR8 <sup>H2</sup> | /                    | GmPRR10 <sup>H1</sup> | GmPRR11 <sup>H1</sup> | GmPRR12 <sup>H1</sup> | GmPRR13 <sup>H2</sup> | GmPRR14 <sup>H3</sup> |
| Henanzaofeng1     | GmPRR1 <sup>H3</sup> | GmPRR2 <sup>H6</sup> | GmPRR3 <sup>H3</sup> | GmPRR4 <sup>H2</sup> | GmPRR5 <sup>H1</sup> | GmPRR6 <sup>H2</sup> | GmPRR7 <sup>H3</sup> | GmPRR8 <sup>H1</sup> | /                    | GmPRR10 <sup>H1</sup> | GmPRR11 <sup>H2</sup> | GmPRR12 <sup>H2</sup> | /                     | GmPRR14 <sup>H2</sup> |
| Mengdou30         | GmPRR1 <sup>H3</sup> | /                    | /                    | /                    | GmPRR5 <sup>H1</sup> | GmPRR6 <sup>H2</sup> | /                    | /                    | GmPRR9 <sup>H1</sup> | GmPRR10 <sup>H1</sup> | GmPRR11 <sup>H1</sup> | GmPRR12 <sup>H3</sup> | GmPRR13 <sup>H1</sup> | GmPRR14 <sup>H2</sup> |
| Suinong3          | GmPRR1 <sup>H4</sup> | GmPRR2 <sup>H1</sup> | GmPRR3 <sup>H1</sup> | GmPRR4 <sup>H1</sup> | GmPRR5 <sup>H1</sup> | GmPRR6 <sup>H1</sup> | GmPRR7 <sup>H3</sup> | GmPRR8 <sup>H1</sup> | GmPRR9 <sup>H1</sup> | GmPRR10 <sup>H1</sup> | GmPRR11 <sup>H1</sup> | GmPRR12 <sup>H1</sup> | GmPRR13 <sup>H2</sup> | GmPRR14 <sup>H2</sup> |
| Kexi283           | GmPRR1 <sup>H4</sup> | GmPRR2 <sup>H1</sup> | GmPRR3 <sup>H1</sup> | GmPRR4 <sup>H1</sup> | GmPRR5 <sup>H1</sup> | GmPRR6 <sup>H1</sup> | GmPRR7 <sup>H3</sup> | GmPRR8 <sup>H2</sup> | GmPRR9 <sup>H1</sup> | GmPRR10 <sup>H1</sup> | GmPRR11 <sup>H1</sup> | GmPRR12 <sup>H1</sup> | GmPRR13 <sup>H2</sup> | GmPRR14 <sup>H2</sup> |
| Kenfeng16         | GmPRR1 <sup>H4</sup> | GmPRR2 <sup>H1</sup> | GmPRR3 <sup>H1</sup> | GmPRR4 <sup>H1</sup> | GmPRR5 <sup>H1</sup> | GmPRR6 <sup>H2</sup> | /                    | GmPRR8 <sup>H1</sup> | GmPRR9 <sup>H1</sup> | GmPRR10 <sup>H1</sup> | GmPRR11 <sup>H1</sup> | GmPRR12 <sup>H3</sup> | GmPRR13 <sup>H2</sup> | GmPRR14 <sup>H2</sup> |
| Mancangjin        | GmPRR1 <sup>H4</sup> | GmPRR2 <sup>H1</sup> | GmPRR3 <sup>H2</sup> | GmPRR4 <sup>H1</sup> | GmPRR5 <sup>H1</sup> | GmPRR6 <sup>H1</sup> | GmPRR7 <sup>H3</sup> | GmPRR8 <sup>H1</sup> | GmPRR9 <sup>H1</sup> | GmPRR10 <sup>H1</sup> | GmPRR11 <sup>H1</sup> | GmPRR12 <sup>H3</sup> | GmPRR13 <sup>H1</sup> | GmPRR14 <sup>H2</sup> |
| Jingshanpu        | GmPRR1 <sup>H4</sup> | GmPRR2 <sup>H1</sup> | GmPRR3 <sup>H2</sup> | GmPRR4 <sup>H1</sup> | GmPRR5 <sup>H1</sup> | GmPRR6 <sup>H1</sup> | GmPRR7 <sup>H3</sup> | GmPRR8 <sup>H1</sup> | GmPRR9 <sup>H1</sup> | GmPRR10 <sup>H1</sup> | GmPRR11 <sup>H1</sup> | GmPRR12 <sup>H3</sup> | GmPRR13 <sup>H1</sup> | GmPRR14 <sup>H2</sup> |
| Huangbaozhu       | GmPRR1 <sup>H4</sup> | GmPRR2 <sup>H1</sup> | GmPRR3 <sup>H2</sup> | GmPRR4 <sup>H1</sup> | GmPRR5 <sup>H1</sup> | GmPRR6 <sup>H2</sup> | GmPRR7 <sup>H3</sup> | GmPRR8 <sup>H1</sup> | GmPRR9 <sup>H1</sup> | GmPRR10 <sup>H1</sup> | GmPRR11 <sup>H1</sup> | GmPRR12 <sup>H3</sup> | GmPRR13 <sup>H1</sup> | GmPRR14 <sup>H2</sup> |
| Tiefeng18         | GmPRR1 <sup>H4</sup> | GmPRR2 <sup>H1</sup> | GmPRR3 <sup>H3</sup> | GmPRR4 <sup>H1</sup> | GmPRR5 <sup>H1</sup> | GmPRR6 <sup>H1</sup> | /                    | GmPRR8 <sup>H1</sup> | GmPRR9 <sup>H1</sup> | GmPRR10 <sup>H1</sup> | GmPRR11 <sup>H2</sup> | GmPRR12 <sup>H3</sup> | GmPRR13 <sup>H1</sup> | /                     |
| Xiaojinhuang1     | GmPRR1 <sup>H4</sup> | GmPRR2 <sup>H1</sup> | GmPRR3 <sup>H3</sup> | GmPRR4 <sup>H1</sup> | GmPRR5 <sup>H1</sup> | GmPRR6 <sup>H2</sup> | GmPRR7 <sup>H3</sup> | GmPRR8 <sup>H1</sup> | GmPRR9 <sup>H1</sup> | GmPRR10 <sup>H1</sup> | GmPRR11 <sup>H1</sup> | GmPRR12 <sup>H3</sup> | GmPRR13 <sup>H1</sup> | GmPRR14 <sup>H2</sup> |
| Jiti1             | GmPRR1 <sup>H4</sup> | GmPRR2 <sup>H1</sup> | GmPRR3 <sup>H3</sup> | GmPRR4 <sup>H1</sup> | GmPRR5 <sup>H1</sup> | GmPRR6 <sup>H2</sup> | GmPRR7 <sup>H3</sup> | GmPRR8 <sup>H1</sup> | GmPRR9 <sup>H1</sup> | GmPRR10 <sup>H1</sup> | GmPRR11 <sup>H1</sup> | GmPRR12 <sup>H3</sup> | GmPRR13 <sup>H1</sup> | GmPRR14 <sup>H2</sup> |
| Jilin6            | GmPRR1 <sup>H4</sup> | GmPRR2 <sup>H1</sup> | GmPRR3 <sup>H3</sup> | GmPRR4 <sup>H1</sup> | GmPRR5 <sup>H1</sup> | GmPRR6 <sup>H2</sup> | GmPRR7 <sup>H3</sup> | GmPRR8 <sup>H1</sup> | GmPRR9 <sup>H1</sup> | GmPRR10 <sup>H1</sup> | GmPRR11 <sup>H1</sup> | GmPRR12 <sup>H3</sup> | GmPRR13 <sup>H1</sup> | GmPRR14 <sup>H2</sup> |
| Jin6604-24        | GmPRR1 <sup>H4</sup> | GmPRR2 <sup>H1</sup> | GmPRR3 <sup>H3</sup> | GmPRR4 <sup>H1</sup> | GmPRR5 <sup>H1</sup> | GmPRR6 <sup>H2</sup> | GmPRR7 <sup>H3</sup> | GmPRR8 <sup>H1</sup> | GmPRR9 <sup>H1</sup> | GmPRR10 <sup>H1</sup> | GmPRR11 <sup>H1</sup> | GmPRR12 <sup>H3</sup> | GmPRR13 <sup>H1</sup> | GmPRR14 <sup>H2</sup> |
| Jin33             | GmPRR1 <sup>H4</sup> | GmPRR2 <sup>H1</sup> | GmPRR3 <sup>H3</sup> | GmPRR4 <sup>H1</sup> | GmPRR5 <sup>H1</sup> | GmPRR6 <sup>H2</sup> | GmPRR7 <sup>H3</sup> | GmPRR8 <sup>H2</sup> | GmPRR9 <sup>H1</sup> | GmPRR10 <sup>H1</sup> | GmPRR11 <sup>H1</sup> | GmPRR12 <sup>H3</sup> | GmPRR13 <sup>H1</sup> | GmPRR14 <sup>H2</sup> |
| Dandou4           | GmPRR1 <sup>H4</sup> | GmPRR2 <sup>H3</sup> | GmPRR3 <sup>H1</sup> | GmPRR4 <sup>H1</sup> | GmPRR5 <sup>H1</sup> | GmPRR6 <sup>H2</sup> | GmPRR7 <sup>H2</sup> | GmPRR8 <sup>H2</sup> | GmPRR9 <sup>H1</sup> | GmPRR10 <sup>H1</sup> | GmPRR11 <sup>H1</sup> | GmPRR12 <sup>H1</sup> | GmPRR13 <sup>H1</sup> | GmPRR14 <sup>H2</sup> |
| Hefeng35          | GmPRR1 <sup>H4</sup> | GmPRR2 <sup>H4</sup> | GmPRR3 <sup>H1</sup> | GmPRR4 <sup>H1</sup> | GmPRR5 <sup>H1</sup> | GmPRR6 <sup>H1</sup> | GmPRR7 <sup>H2</sup> | GmPRR8 <sup>H1</sup> | GmPRR9 <sup>H1</sup> | GmPRR10 <sup>H1</sup> | GmPRR11 <sup>H1</sup> | GmPRR12 <sup>H1</sup> | GmPRR13 <sup>H1</sup> | GmPRR14 <sup>H2</sup> |
| Hefeng47          | GmPRR1 <sup>H4</sup> | GmPRR2 <sup>H4</sup> | GmPRR3 <sup>H1</sup> | GmPRR4 <sup>H1</sup> | GmPRR5 <sup>H1</sup> | GmPRR6 <sup>H1</sup> | GmPRR7 <sup>H2</sup> | GmPRR8 <sup>H1</sup> | GmPRR9 <sup>H1</sup> | GmPRR10 <sup>H1</sup> | GmPRR11 <sup>H1</sup> | GmPRR12 <sup>H1</sup> | GmPRR13 <sup>H1</sup> | GmPRR14 <sup>H2</sup> |
| Hefeng50          | GmPRR1 <sup>H4</sup> | GmPRR2 <sup>H4</sup> | GmPRR3 <sup>H1</sup> | GmPRR4 <sup>H1</sup> | GmPRR5 <sup>H1</sup> | GmPRR6 <sup>H1</sup> | GmPRR7 <sup>H2</sup> | GmPRR8 <sup>H1</sup> | GmPRR9 <sup>H1</sup> | GmPRR10 <sup>H1</sup> | GmPRR11 <sup>H1</sup> | GmPRR12 <sup>H1</sup> | GmPRR13 <sup>H1</sup> | GmPRR14 <sup>H2</sup> |
| Fushou            | GmPRR1 <sup>H4</sup> | GmPRR2 <sup>H4</sup> | GmPRR3 <sup>H1</sup> | GmPRR4 <sup>H1</sup> | GmPRR5 <sup>H1</sup> | GmPRR6 <sup>H1</sup> | GmPRR7 <sup>H2</sup> | GmPRR8 <sup>H1</sup> | GmPRR9 <sup>H1</sup> | GmPRR10 <sup>H1</sup> | GmPRR11 <sup>H1</sup> | GmPRR12 <sup>H1</sup> | GmPRR13 <sup>H1</sup> | GmPRR14 <sup>H2</sup> |
| Heihe27           | GmPRR1 <sup>H4</sup> | GmPRR2 <sup>H4</sup> | GmPRR3 <sup>H1</sup> | GmPRR4 <sup>H1</sup> | GmPRR5 <sup>H1</sup> | GmPRR6 <sup>H1</sup> | GmPRR7 <sup>H3</sup> | GmPRR8 <sup>H1</sup> | GmPRR9 <sup>H1</sup> | GmPRR10 <sup>H1</sup> | GmPRR11 <sup>H1</sup> | /                     | GmPRR13 <sup>H2</sup> | GmPRR14 <sup>H2</sup> |

| Variety           | GmPRR1               | GmPRR2               | GmPRR3               | GmPRR4               | GmPRR5               | GmPRR6               | GmPRR7               | GmPRR8               | GmPRR9               | GmPRR10               | GmPRR11               | GmPRR12               | GmPRR13               | GmPRR14               |
|-------------------|----------------------|----------------------|----------------------|----------------------|----------------------|----------------------|----------------------|----------------------|----------------------|-----------------------|-----------------------|-----------------------|-----------------------|-----------------------|
| Dongnong4         | GmPRR1 <sup>H4</sup> | GmPRR2 <sup>H4</sup> | GmPRR3 <sup>H1</sup> | GmPRR4 <sup>H1</sup> | GmPRR5 <sup>H1</sup> | GmPRR6 <sup>H1</sup> | GmPRR7 <sup>H3</sup> | GmPRR8 <sup>H1</sup> | GmPRR9 <sup>H1</sup> | GmPRR10 <sup>H1</sup> | GmPRR11 <sup>H1</sup> | GmPRR12 <sup>H1</sup> | GmPRR13 <sup>H1</sup> | GmPRR14 <sup>H2</sup> |
| Hejiao8           | GmPRR1 <sup>H4</sup> | GmPRR2 <sup>H4</sup> | GmPRR3 <sup>H1</sup> | GmPRR4 <sup>H1</sup> | GmPRR5 <sup>H1</sup> | GmPRR6 <sup>H1</sup> | GmPRR7 <sup>H3</sup> | GmPRR8 <sup>H1</sup> | GmPRR9 <sup>H1</sup> | GmPRR10 <sup>H1</sup> | GmPRR11 <sup>H1</sup> | GmPRR12 <sup>H1</sup> | GmPRR13 <sup>H1</sup> | GmPRR14 <sup>H2</sup> |
| Suinong8          | GmPRR1 <sup>H4</sup> | GmPRR2 <sup>H4</sup> | GmPRR3 <sup>H1</sup> | GmPRR4 <sup>H1</sup> | GmPRR5 <sup>H1</sup> | GmPRR6 <sup>H1</sup> | GmPRR7 <sup>H3</sup> | GmPRR8 <sup>H1</sup> | GmPRR9 <sup>H1</sup> | GmPRR10 <sup>H1</sup> | GmPRR11 <sup>H1</sup> | GmPRR12 <sup>H1</sup> | GmPRR13 <sup>H1</sup> | GmPRR14 <sup>H2</sup> |
| Heinong43         | GmPRR1 <sup>H4</sup> | GmPRR2 <sup>H4</sup> | GmPRR3 <sup>H1</sup> | GmPRR4 <sup>H1</sup> | GmPRR5 <sup>H1</sup> | GmPRR6 <sup>H1</sup> | GmPRR7 <sup>H3</sup> | GmPRR8 <sup>H1</sup> | GmPRR9 <sup>H1</sup> | GmPRR10 <sup>H1</sup> | GmPRR11 <sup>H1</sup> | GmPRR12 <sup>H1</sup> | GmPRR13 <sup>H1</sup> | GmPRR14 <sup>H2</sup> |
| Beifeng2          | GmPRR1 <sup>H4</sup> | GmPRR2 <sup>H4</sup> | GmPRR3 <sup>H1</sup> | GmPRR4 <sup>H1</sup> | GmPRR5 <sup>H1</sup> | GmPRR6 <sup>H1</sup> | GmPRR7 <sup>H3</sup> | GmPRR8 <sup>H1</sup> | GmPRR9 <sup>H1</sup> | GmPRR10 <sup>H1</sup> | GmPRR11 <sup>H1</sup> | GmPRR12 <sup>H1</sup> | GmPRR13 <sup>H2</sup> | GmPRR14 <sup>H2</sup> |
| Beihudou          | GmPRR1 <sup>H4</sup> | GmPRR2 <sup>H4</sup> | GmPRR3 <sup>H1</sup> | GmPRR4 <sup>H1</sup> | GmPRR5 <sup>H1</sup> | GmPRR6 <sup>H1</sup> | GmPRR7 <sup>H3</sup> | GmPRR8 <sup>H1</sup> | GmPRR9 <sup>H1</sup> | GmPRR10 <sup>H1</sup> | GmPRR11 <sup>H1</sup> | GmPRR12 <sup>H1</sup> | GmPRR13 <sup>H2</sup> | GmPRR14 <sup>H2</sup> |
| PI 548540         | GmPRR1 <sup>H4</sup> | GmPRR2 <sup>H4</sup> | GmPRR3 <sup>H1</sup> | GmPRR4 <sup>H1</sup> | GmPRR5 <sup>H1</sup> | GmPRR6 <sup>H1</sup> | GmPRR7 <sup>H3</sup> | GmPRR8 <sup>H1</sup> | GmPRR9 <sup>H1</sup> | GmPRR10 <sup>H1</sup> | GmPRR11 <sup>H1</sup> | GmPRR12 <sup>H3</sup> | GmPRR13 <sup>H2</sup> | GmPRR14 <sup>H2</sup> |
| Harosoy63         | GmPRR1 <sup>H4</sup> | GmPRR2 <sup>H4</sup> | GmPRR3 <sup>H1</sup> | GmPRR4 <sup>H1</sup> | GmPRR5 <sup>H1</sup> | GmPRR6 <sup>H1</sup> | GmPRR7 <sup>H3</sup> | GmPRR8 <sup>H1</sup> | GmPRR9 <sup>H1</sup> | GmPRR10 <sup>H1</sup> | GmPRR11 <sup>H1</sup> | GmPRR12 <sup>H3</sup> | GmPRR13 <sup>H2</sup> | GmPRR14 <sup>H2</sup> |
| Hefeng55          | GmPRR1 <sup>H4</sup> | GmPRR2 <sup>H4</sup> | GmPRR3 <sup>H1</sup> | GmPRR4 <sup>H1</sup> | GmPRR5 <sup>H1</sup> | GmPRR6 <sup>H1</sup> | GmPRR7 <sup>H3</sup> | GmPRR8 <sup>H1</sup> | GmPRR9 <sup>H1</sup> | GmPRR10 <sup>H1</sup> | GmPRR11 <sup>H1</sup> | GmPRR12 <sup>H3</sup> | GmPRR13 <sup>H2</sup> | GmPRR14 <sup>H2</sup> |
| Changjihuanguadou | GmPRR1 <sup>H4</sup> | GmPRR2 <sup>H4</sup> | GmPRR3 <sup>H1</sup> | GmPRR4 <sup>H1</sup> | GmPRR5 <sup>H1</sup> | GmPRR6 <sup>H1</sup> | GmPRR7 <sup>H3</sup> | GmPRR8 <sup>H1</sup> | GmPRR9 <sup>H1</sup> | GmPRR10 <sup>H1</sup> | GmPRR11 <sup>H1</sup> | GmPRR12 <sup>H3</sup> | GmPRR13 <sup>H1</sup> | GmPRR14 <sup>H2</sup> |
| Amsoy             | GmPRR1 <sup>H4</sup> | GmPRR2 <sup>H4</sup> | GmPRR3 <sup>H1</sup> | GmPRR4 <sup>H1</sup> | GmPRR5 <sup>H1</sup> | GmPRR6 <sup>H1</sup> | GmPRR7 <sup>H3</sup> | GmPRR8 <sup>H2</sup> | GmPRR9 <sup>H1</sup> | GmPRR10 <sup>H1</sup> | GmPRR11 <sup>H1</sup> | GmPRR12 <sup>H3</sup> | GmPRR13 <sup>H1</sup> | GmPRR14 <sup>H2</sup> |
| Amsoy71           | GmPRR1 <sup>H4</sup> | GmPRR2 <sup>H4</sup> | GmPRR3 <sup>H1</sup> | GmPRR4 <sup>H1</sup> | GmPRR5 <sup>H1</sup> | GmPRR6 <sup>H1</sup> | GmPRR7 <sup>H3</sup> | GmPRR8 <sup>H2</sup> | GmPRR9 <sup>H1</sup> | GmPRR10 <sup>H1</sup> | GmPRR11 <sup>H1</sup> | GmPRR12 <sup>H3</sup> | GmPRR13 <sup>H1</sup> | GmPRR14 <sup>H2</sup> |
| Fengshou19        | GmPRR1 <sup>H4</sup> | GmPRR2 <sup>H4</sup> | GmPRR3 <sup>H1</sup> | GmPRR4 <sup>H1</sup> | GmPRR5 <sup>H1</sup> | GmPRR6 <sup>H2</sup> | GmPRR7 <sup>H3</sup> | GmPRR8 <sup>H1</sup> | GmPRR9 <sup>H1</sup> | GmPRR10 <sup>H1</sup> | GmPRR11 <sup>H1</sup> | GmPRR12 <sup>H1</sup> | GmPRR13 <sup>H1</sup> | GmPRR14 <sup>H2</sup> |
| Heihe38           | GmPRR1 <sup>H4</sup> | GmPRR2 <sup>H4</sup> | GmPRR3 <sup>H1</sup> | GmPRR4 <sup>H1</sup> | GmPRR5 <sup>H1</sup> | GmPRR6 <sup>H2</sup> | GmPRR7 <sup>H2</sup> | GmPRR8 <sup>H1</sup> | GmPRR9 <sup>H1</sup> | GmPRR10 <sup>H1</sup> | GmPRR11 <sup>H1</sup> | GmPRR12 <sup>H1</sup> | GmPRR13 <sup>H2</sup> | GmPRR14 <sup>H2</sup> |
| Wilkin            | GmPRR1 <sup>H4</sup> | GmPRR2 <sup>H4</sup> | GmPRR3 <sup>H1</sup> | GmPRR4 <sup>H2</sup> | GmPRR5 <sup>H1</sup> | GmPRR6 <sup>H1</sup> | GmPRR7 <sup>H3</sup> | GmPRR8 <sup>H1</sup> | GmPRR9 <sup>H1</sup> | GmPRR10 <sup>H1</sup> | GmPRR11 <sup>H1</sup> | GmPRR12 <sup>H3</sup> | GmPRR13 <sup>H1</sup> | GmPRR14 <sup>H3</sup> |
| Heihe3            | GmPRR1 <sup>H4</sup> | GmPRR2 <sup>H4</sup> | GmPRR3 <sup>H1</sup> | GmPRR4 <sup>H2</sup> | GmPRR5 <sup>H1</sup> | GmPRR6 <sup>H1</sup> | GmPRR7 <sup>H3</sup> | GmPRR8 <sup>H2</sup> | GmPRR9 <sup>H1</sup> | GmPRR10 <sup>H1</sup> | GmPRR11 <sup>H1</sup> | GmPRR12 <sup>H3</sup> | GmPRR13 <sup>H2</sup> | GmPRR14 <sup>H1</sup> |
| Heihe51           | GmPRR1 <sup>H4</sup> | GmPRR2 <sup>H4</sup> | GmPRR3 <sup>H1</sup> | GmPRR4 <sup>H2</sup> | GmPRR5 <sup>H1</sup> | GmPRR6 <sup>H1</sup> | GmPRR7 <sup>H3</sup> | GmPRR8 <sup>H2</sup> | GmPRR9 <sup>H1</sup> | GmPRR10 <sup>H1</sup> | GmPRR11 <sup>H1</sup> | GmPRR12 <sup>H3</sup> | GmPRR13 <sup>H2</sup> | GmPRR14 <sup>H1</sup> |
| Heihe54           | GmPRR1 <sup>H4</sup> | GmPRR2 <sup>H4</sup> | GmPRR3 <sup>H1</sup> | GmPRR4 <sup>H2</sup> | GmPRR5 <sup>H1</sup> | GmPRR6 <sup>H1</sup> | GmPRR7 <sup>H3</sup> | GmPRR8 <sup>H2</sup> | GmPRR9 <sup>H1</sup> | GmPRR10 <sup>H1</sup> | GmPRR11 <sup>H1</sup> | GmPRR12 <sup>H3</sup> | GmPRR13 <sup>H2</sup> | GmPRR14 <sup>H1</sup> |
| Heilongjiang41    | GmPRR1 <sup>H4</sup> | GmPRR2 <sup>H4</sup> | GmPRR3 <sup>H1</sup> | GmPRR4 <sup>H2</sup> | GmPRR5 <sup>H1</sup> | GmPRR6 <sup>H2</sup> | GmPRR7 <sup>H3</sup> | GmPRR8 <sup>H2</sup> | GmPRR9 <sup>H1</sup> | GmPRR10 <sup>H1</sup> | GmPRR11 <sup>H1</sup> | GmPRR12 <sup>H1</sup> | GmPRR13 <sup>H2</sup> | GmPRR14 <sup>H2</sup> |
| Fengshou24        | GmPRR1 <sup>H4</sup> | GmPRR2 <sup>H4</sup> | GmPRR3 <sup>H2</sup> | GmPRR4 <sup>H1</sup> | GmPRR5 <sup>H1</sup> | GmPRR6 <sup>H1</sup> | GmPRR7 <sup>H3</sup> | /                    | GmPRR9 <sup>H1</sup> | GmPRR10 <sup>H1</sup> | GmPRR11 <sup>H1</sup> | GmPRR12 <sup>H1</sup> | GmPRR13 <sup>H1</sup> | GmPRR14 <sup>H2</sup> |
| Heinong16         | GmPRR1 <sup>H4</sup> | GmPRR2 <sup>H4</sup> | GmPRR3 <sup>H2</sup> | GmPRR4 <sup>H1</sup> | GmPRR5 <sup>H1</sup> | GmPRR6 <sup>H1</sup> | GmPRR7 <sup>H3</sup> | GmPRR8 <sup>H1</sup> | GmPRR9 <sup>H1</sup> | GmPRR10 <sup>H1</sup> | GmPRR11 <sup>H1</sup> | GmPRR12 <sup>H1</sup> | GmPRR13 <sup>H1</sup> | GmPRR14 <sup>H2</sup> |
| Heinong26         | GmPRR1 <sup>H4</sup> | GmPRR2 <sup>H4</sup> | GmPRR3 <sup>H2</sup> | GmPRR4 <sup>H1</sup> | GmPRR5 <sup>H1</sup> | GmPRR6 <sup>H1</sup> | GmPRR7 <sup>H3</sup> | GmPRR8 <sup>H1</sup> | GmPRR9 <sup>H1</sup> | GmPRR10 <sup>H1</sup> | GmPRR11 <sup>H1</sup> | GmPRR12 <sup>H1</sup> | GmPRR13 <sup>H1</sup> | GmPRR14 <sup>H2</sup> |
| Hefeng22          | GmPRR1 <sup>H4</sup> | GmPRR2 <sup>H4</sup> | GmPRR3 <sup>H2</sup> | GmPRR4 <sup>H1</sup> | GmPRR5 <sup>H1</sup> | GmPRR6 <sup>H1</sup> | GmPRR7 <sup>H3</sup> | GmPRR8 <sup>H1</sup> | GmPRR9 <sup>H1</sup> | GmPRR10 <sup>H1</sup> | GmPRR11 <sup>H1</sup> | /                     | /                     | GmPRR14 <sup>H2</sup> |
| Heinong33         | GmPRR1 <sup>H4</sup> | GmPRR2 <sup>H4</sup> | GmPRR3 <sup>H2</sup> | GmPRR4 <sup>H1</sup> | GmPRR5 <sup>H1</sup> | GmPRR6 <sup>H1</sup> | GmPRR7 <sup>H3</sup> | GmPRR8 <sup>H1</sup> | GmPRR9 <sup>H1</sup> | GmPRR10 <sup>H1</sup> | GmPRR11 <sup>H1</sup> | GmPRR12 <sup>H2</sup> | GmPRR13 <sup>H2</sup> | GmPRR14 <sup>H2</sup> |
| Zhi2              | GmPRR1 <sup>H4</sup> | GmPRR2 <sup>H4</sup> | GmPRR3 <sup>H2</sup> | GmPRR4 <sup>H1</sup> | GmPRR5 <sup>H1</sup> | GmPRR6 <sup>H1</sup> | GmPRR7 <sup>H3</sup> | GmPRR8 <sup>H1</sup> | GmPRR9 <sup>H1</sup> | GmPRR10 <sup>H1</sup> | GmPRR11 <sup>H1</sup> | GmPRR12 <sup>H3</sup> | GmPRR13 <sup>H1</sup> | GmPRR14 <sup>H2</sup> |

| Variety           | GmPRR1               | GmPRR2               | GmPRR3               | GmPRR4               | GmPRR5               | GmPRR6               | GmPRR7               | GmPRR8               | GmPRR9               | GmPRR10               | GmPRR11               | GmPRR12               | GmPRR13               | GmPRR14               |
|-------------------|----------------------|----------------------|----------------------|----------------------|----------------------|----------------------|----------------------|----------------------|----------------------|-----------------------|-----------------------|-----------------------|-----------------------|-----------------------|
| Hejiao6           | GmPRR1 <sup>H4</sup> | GmPRR2 <sup>H4</sup> | GmPRR3 <sup>H2</sup> | GmPRR4 <sup>H1</sup> | GmPRR5 <sup>H1</sup> | GmPRR6 <sup>H1</sup> | GmPRR7 <sup>H3</sup> | GmPRR8 <sup>H1</sup> | GmPRR9 <sup>H1</sup> | GmPRR10 <sup>H1</sup> | GmPRR11 <sup>H1</sup> | GmPRR12 <sup>H3</sup> | GmPRR13 <sup>H2</sup> | GmPRR14 <sup>H2</sup> |
| McCall            | GmPRR1 <sup>H4</sup> | GmPRR2 <sup>H4</sup> | GmPRR3 <sup>H2</sup> | GmPRR4 <sup>H1</sup> | GmPRR5 <sup>H1</sup> | GmPRR6 <sup>H1</sup> | GmPRR7 <sup>H3</sup> | GmPRR8 <sup>H1</sup> | GmPRR9 <sup>H1</sup> | GmPRR10 <sup>H1</sup> | GmPRR11 <sup>H1</sup> | GmPRR12 <sup>H3</sup> | GmPRR13 <sup>H2</sup> | GmPRR14 <sup>H2</sup> |
| Hark              | GmPRR1 <sup>H4</sup> | GmPRR2 <sup>H4</sup> | GmPRR3 <sup>H2</sup> | GmPRR4 <sup>H1</sup> | GmPRR5 <sup>H1</sup> | GmPRR6 <sup>H1</sup> | GmPRR7 <sup>H3</sup> | GmPRR8 <sup>H1</sup> | GmPRR9 <sup>H1</sup> | GmPRR10 <sup>H1</sup> | GmPRR11 <sup>H1</sup> | GmPRR12 <sup>H3</sup> | GmPRR13 <sup>H2</sup> | GmPRR14 <sup>H2</sup> |
| Jindou2           | GmPRR1 <sup>H4</sup> | GmPRR2 <sup>H4</sup> | GmPRR3 <sup>H2</sup> | GmPRR4 <sup>H1</sup> | GmPRR5 <sup>H1</sup> | GmPRR6 <sup>H2</sup> | GmPRR7 <sup>H3</sup> | GmPRR8 <sup>H1</sup> | GmPRR9 <sup>H1</sup> | GmPRR10 <sup>H1</sup> | GmPRR11 <sup>H1</sup> | GmPRR12 <sup>H1</sup> | GmPRR13 <sup>H2</sup> | GmPRR14 <sup>H2</sup> |
| Jiunong9          | GmPRR1 <sup>H4</sup> | GmPRR2 <sup>H4</sup> | GmPRR3 <sup>H2</sup> | GmPRR4 <sup>H1</sup> | GmPRR5 <sup>H1</sup> | GmPRR6 <sup>H2</sup> | GmPRR7 <sup>H3</sup> | GmPRR8 <sup>H1</sup> | GmPRR9 <sup>H1</sup> | GmPRR10 <sup>H1</sup> | GmPRR11 <sup>H1</sup> | GmPRR12 <sup>H3</sup> | GmPRR13 <sup>H1</sup> | GmPRR14 <sup>H2</sup> |
| Tiefeng20         | GmPRR1 <sup>H4</sup> | GmPRR2 <sup>H4</sup> | GmPRR3 <sup>H2</sup> | GmPRR4 <sup>H1</sup> | GmPRR5 <sup>H1</sup> | GmPRR6 <sup>H2</sup> | GmPRR7 <sup>H3</sup> | GmPRR8 <sup>H1</sup> | GmPRR9 <sup>H1</sup> | GmPRR10 <sup>H1</sup> | GmPRR11 <sup>H1</sup> | GmPRR12 <sup>H3</sup> | GmPRR13 <sup>H1</sup> | GmPRR14 <sup>H2</sup> |
| Tiefeng8          | GmPRR1 <sup>H4</sup> | GmPRR2 <sup>H4</sup> | GmPRR3 <sup>H2</sup> | GmPRR4 <sup>H1</sup> | GmPRR5 <sup>H1</sup> | GmPRR6 <sup>H2</sup> | GmPRR7 <sup>H3</sup> | GmPRR8 <sup>H1</sup> | GmPRR9 <sup>H1</sup> | GmPRR10 <sup>H1</sup> | GmPRR11 <sup>H1</sup> | GmPRR12 <sup>H3</sup> | GmPRR13 <sup>H2</sup> | GmPRR14 <sup>H3</sup> |
| Fengdihuang       | GmPRR1 <sup>H4</sup> | GmPRR2 <sup>H4</sup> | GmPRR3 <sup>H2</sup> | GmPRR4 <sup>H1</sup> | GmPRR5 <sup>H1</sup> | GmPRR6 <sup>H3</sup> | GmPRR7 <sup>H3</sup> | GmPRR8 <sup>H1</sup> | GmPRR9 <sup>H1</sup> | GmPRR10 <sup>H1</sup> | GmPRR11 <sup>H1</sup> | GmPRR12 <sup>H3</sup> | GmPRR13 <sup>H1</sup> | GmPRR14 <sup>H3</sup> |
| Changpingqingdou  | GmPRR1 <sup>H4</sup> | GmPRR2 <sup>H4</sup> | GmPRR3 <sup>H2</sup> | GmPRR4 <sup>H1</sup> | GmPRR5 <sup>H1</sup> | GmPRR6 <sup>H3</sup> | GmPRR7 <sup>H3</sup> | /                    | GmPRR9 <sup>H3</sup> | GmPRR10 <sup>H1</sup> | /                     | GmPRR12 <sup>H3</sup> | GmPRR13 <sup>H1</sup> | GmPRR14 <sup>H2</sup> |
| Jindou25          | GmPRR1 <sup>H4</sup> | GmPRR2 <sup>H4</sup> | GmPRR3 <sup>H2</sup> | GmPRR4 <sup>H1</sup> | GmPRR5 <sup>H1</sup> | GmPRR6 <sup>H3</sup> | GmPRR7 <sup>H4</sup> | GmPRR8 <sup>H2</sup> | /                    | GmPRR10 <sup>H1</sup> | GmPRR11 <sup>H2</sup> | GmPRR12 <sup>H3</sup> | GmPRR13 <sup>H2</sup> | GmPRR14 <sup>H3</sup> |
| Qiandou6          | GmPRR1 <sup>H4</sup> | GmPRR2 <sup>H4</sup> | GmPRR3 <sup>H2</sup> | GmPRR4 <sup>H1</sup> | GmPRR5 <sup>H4</sup> | /                    | /                    | GmPRR8 <sup>H1</sup> | GmPRR9 <sup>H2</sup> | GmPRR10 <sup>H1</sup> | GmPRR11 <sup>H2</sup> | GmPRR12 <sup>H1</sup> | GmPRR13 <sup>H2</sup> | GmPRR14 <sup>H2</sup> |
| Zaofeng1          | GmPRR1 <sup>H4</sup> | GmPRR2 <sup>H4</sup> | GmPRR3 <sup>H2</sup> | GmPRR4 <sup>H2</sup> | GmPRR5 <sup>H1</sup> | GmPRR6 <sup>H2</sup> | GmPRR7 <sup>H3</sup> | GmPRR8 <sup>H2</sup> | GmPRR9 <sup>H1</sup> | GmPRR10 <sup>H1</sup> | GmPRR11 <sup>H1</sup> | GmPRR12 <sup>H3</sup> | GmPRR13 <sup>H1</sup> | GmPRR14 <sup>H2</sup> |
| Jinjiangdaqingren | GmPRR1 <sup>H4</sup> | GmPRR2 <sup>H4</sup> | GmPRR3 <sup>H2</sup> | GmPRR4 <sup>H2</sup> | GmPRR5 <sup>H1</sup> | GmPRR6 <sup>H3</sup> | GmPRR7 <sup>H4</sup> | GmPRR8 <sup>H1</sup> | GmPRR9 <sup>H1</sup> | GmPRR10 <sup>H1</sup> | GmPRR11 <sup>H1</sup> | GmPRR12 <sup>H1</sup> | GmPRR13 <sup>H1</sup> | GmPRR14 <sup>32</sup> |
| Yangchunqingpidou | GmPRR1 <sup>H4</sup> | GmPRR2 <sup>H4</sup> | GmPRR3 <sup>H2</sup> | GmPRR4 <sup>H2</sup> | GmPRR5 <sup>H1</sup> | GmPRR6 <sup>H3</sup> | GmPRR7 <sup>H3</sup> | GmPRR8 <sup>H2</sup> | GmPRR9 <sup>H3</sup> | GmPRR10 <sup>H1</sup> | GmPRR11 <sup>H1</sup> | GmPRR12 <sup>H5</sup> | GmPRR13 <sup>H2</sup> | GmPRR14 <sup>H2</sup> |
| Bedford           | GmPRR1 <sup>H4</sup> | GmPRR2 <sup>H4</sup> | GmPRR3 <sup>H2</sup> | GmPRR4 <sup>H2</sup> | GmPRR5 <sup>H1</sup> | GmPRR6 <sup>H4</sup> | GmPRR7 <sup>H3</sup> | GmPRR8 <sup>H1</sup> | GmPRR9 <sup>H1</sup> | GmPRR10 <sup>H1</sup> | GmPRR11 <sup>H2</sup> | GmPRR12 <sup>H1</sup> | GmPRR13 <sup>H2</sup> | GmPRR14 <sup>H2</sup> |
| Hezeniumaohuang   | GmPRR1 <sup>H4</sup> | GmPRR2 <sup>H4</sup> | GmPRR3 <sup>H2</sup> | GmPRR4 <sup>H2</sup> | /                    | GmPRR6 <sup>H4</sup> | GmPRR7 <sup>H4</sup> | GmPRR8 <sup>H1</sup> | GmPRR9 <sup>H1</sup> | GmPRR10 <sup>H1</sup> | GmPRR11 <sup>H1</sup> | GmPRR12 <sup>H3</sup> | GmPRR13 <sup>H2</sup> | GmPRR14 <sup>H3</sup> |
| Xudou5            | GmPRR1 <sup>H4</sup> | GmPRR2 <sup>H4</sup> | GmPRR3 <sup>H2</sup> | GmPRR4 <sup>H2</sup> | GmPRR5 <sup>H2</sup> | GmPRR6 <sup>H2</sup> | GmPRR7 <sup>H2</sup> | GmPRR8 <sup>H2</sup> | GmPRR9 <sup>H1</sup> | GmPRR10 <sup>H1</sup> | GmPRR11 <sup>H2</sup> | GmPRR12 <sup>H1</sup> | GmPRR13 <sup>H2</sup> | GmPRR14 <sup>H2</sup> |
| Yudou2            | GmPRR1 <sup>H4</sup> | GmPRR2 <sup>H4</sup> | GmPRR3 <sup>H2</sup> | GmPRR4 <sup>H2</sup> | GmPRR5 <sup>H4</sup> | GmPRR6 <sup>H4</sup> | GmPRR7 <sup>H3</sup> | GmPRR8 <sup>H1</sup> | GmPRR9 <sup>H1</sup> | GmPRR10 <sup>H1</sup> | GmPRR11 <sup>H2</sup> | GmPRR12 <sup>H3</sup> | GmPRR13 <sup>H1</sup> | GmPRR14 <sup>H2</sup> |
| Xudou2            | GmPRR1 <sup>H4</sup> | GmPRR2 <sup>H4</sup> | GmPRR3 <sup>H2</sup> | GmPRR4 <sup>H2</sup> | GmPRR5 <sup>H4</sup> | GmPRR6 <sup>H2</sup> | GmPRR7 <sup>H4</sup> | GmPRR8 <sup>H2</sup> | GmPRR9 <sup>H1</sup> | GmPRR10 <sup>H1</sup> | GmPRR11 <sup>H2</sup> | GmPRR12 <sup>H1</sup> | GmPRR13 <sup>H2</sup> | GmPRR14 <sup>H2</sup> |
| Zaofeng12         | GmPRR1 <sup>H4</sup> | GmPRR2 <sup>H4</sup> | GmPRR3 <sup>H3</sup> | GmPRR4 <sup>H1</sup> | GmPRR5 <sup>H1</sup> | GmPRR6 <sup>H1</sup> | GmPRR7 <sup>H3</sup> | GmPRR8 <sup>H1</sup> | GmPRR9 <sup>H1</sup> | GmPRR10 <sup>H1</sup> | GmPRR11 <sup>H1</sup> | GmPRR12 <sup>H3</sup> | GmPRR13 <sup>H1</sup> | GmPRR14 <sup>H2</sup> |
| Heihe18           | GmPRR1 <sup>H4</sup> | GmPRR2 <sup>H4</sup> | GmPRR3 <sup>H3</sup> | GmPRR4 <sup>H1</sup> | GmPRR5 <sup>H1</sup> | GmPRR6 <sup>H1</sup> | GmPRR7 <sup>H3</sup> | GmPRR8 <sup>H1</sup> | GmPRR9 <sup>H1</sup> | GmPRR10 <sup>H1</sup> | GmPRR11 <sup>H1</sup> | GmPRR12 <sup>H3</sup> | GmPRR13 <sup>H1</sup> | GmPRR14 <sup>H2</sup> |
| Kaiyu10           | GmPRR1 <sup>H4</sup> | GmPRR2 <sup>H4</sup> | GmPRR3 <sup>H3</sup> | GmPRR4 <sup>H1</sup> | GmPRR5 <sup>H1</sup> | GmPRR6 <sup>H1</sup> | GmPRR7 <sup>H3</sup> | GmPRR8 <sup>H1</sup> | GmPRR9 <sup>H1</sup> | GmPRR10 <sup>H1</sup> | GmPRR11 <sup>H1</sup> | GmPRR12 <sup>H3</sup> | GmPRR13 <sup>H1</sup> | GmPRR14 <sup>H4</sup> |
| Portage           | GmPRR1 <sup>H4</sup> | GmPRR2 <sup>H4</sup> | GmPRR3 <sup>H3</sup> | GmPRR4 <sup>H1</sup> | GmPRR5 <sup>H1</sup> | GmPRR6 <sup>H1</sup> | GmPRR7 <sup>H3</sup> | GmPRR8 <sup>H1</sup> | GmPRR9 <sup>H1</sup> | GmPRR10 <sup>H1</sup> | GmPRR11 <sup>H1</sup> | GmPRR12 <sup>H3</sup> | GmPRR13 <sup>H2</sup> | GmPRR14 <sup>H2</sup> |
| Dongnong72-806    | GmPRR1 <sup>H4</sup> | GmPRR2 <sup>H4</sup> | GmPRR3 <sup>H3</sup> | GmPRR4 <sup>H1</sup> | GmPRR5 <sup>H1</sup> | GmPRR6 <sup>H1</sup> | GmPRR7 <sup>H3</sup> | GmPRR8 <sup>H1</sup> | GmPRR9 <sup>H1</sup> | GmPRR10 <sup>H1</sup> | GmPRR11 <sup>H1</sup> | GmPRR12 <sup>H3</sup> | GmPRR13 <sup>H2</sup> | GmPRR14 <sup>H2</sup> |

| Variety         | GmPRR1               | GmPRR2               | GmPRR3               | GmPRR4               | GmPRR5               | GmPRR6               | GmPRR7               | GmPRR8               | GmPRR9               | GmPRR10               | GmPRR11               | GmPRR12               | GmPRR13               | GmPRR14               |
|-----------------|----------------------|----------------------|----------------------|----------------------|----------------------|----------------------|----------------------|----------------------|----------------------|-----------------------|-----------------------|-----------------------|-----------------------|-----------------------|
| Zihua4          | GmPRR1 <sup>H4</sup> | GmPRR2 <sup>H4</sup> | GmPRR3 <sup>H3</sup> | GmPRR4 <sup>H1</sup> | GmPRR5 <sup>H1</sup> | GmPRR6 <sup>H1</sup> | GmPRR7 <sup>H3</sup> | GmPRR8 <sup>H2</sup> | GmPRR9 <sup>H1</sup> | GmPRR10 <sup>H1</sup> | GmPRR11 <sup>H1</sup> | GmPRR12 <sup>H3</sup> | GmPRR13 <sup>H1</sup> | GmPRR14 <sup>H2</sup> |
| Evans           | GmPRR1 <sup>H4</sup> | GmPRR2 <sup>H4</sup> | GmPRR3 <sup>H3</sup> | GmPRR4 <sup>H1</sup> | GmPRR5 <sup>H1</sup> | GmPRR6 <sup>H1</sup> | GmPRR7 <sup>H3</sup> | GmPRR8 <sup>H2</sup> | GmPRR9 <sup>H1</sup> | GmPRR10 <sup>H1</sup> | GmPRR11 <sup>H1</sup> | GmPRR12 <sup>H3</sup> | GmPRR13 <sup>H1</sup> | GmPRR14 <sup>H2</sup> |
| Jiyu57          | GmPRR1 <sup>H4</sup> | GmPRR2 <sup>H4</sup> | GmPRR3 <sup>H3</sup> | GmPRR4 <sup>H1</sup> | GmPRR5 <sup>H1</sup> | GmPRR6 <sup>H2</sup> | GmPRR7 <sup>H2</sup> | GmPRR8 <sup>H1</sup> | GmPRR9 <sup>H1</sup> | GmPRR10 <sup>H1</sup> | GmPRR11 <sup>H1</sup> | GmPRR12 <sup>H3</sup> | GmPRR13 <sup>H1</sup> | GmPRR14 <sup>H2</sup> |
| Fengshou10      | GmPRR1 <sup>H4</sup> | GmPRR2 <sup>H4</sup> | GmPRR3 <sup>H3</sup> | GmPRR4 <sup>H1</sup> | GmPRR5 <sup>H1</sup> | GmPRR6 <sup>H2</sup> | GmPRR7 <sup>H3</sup> | GmPRR8 <sup>H1</sup> | GmPRR9 <sup>H1</sup> | GmPRR10 <sup>H1</sup> | GmPRR11 <sup>H1</sup> | GmPRR12 <sup>H1</sup> | GmPRR13 <sup>H2</sup> | GmPRR14 <sup>H2</sup> |
| Fengshou17      | GmPRR1 <sup>H4</sup> | GmPRR2 <sup>H4</sup> | GmPRR3 <sup>H3</sup> | GmPRR4 <sup>H1</sup> | GmPRR5 <sup>H1</sup> | GmPRR6 <sup>H2</sup> | GmPRR7 <sup>H3</sup> | GmPRR8 <sup>H1</sup> | GmPRR9 <sup>H1</sup> | GmPRR10 <sup>H1</sup> | GmPRR11 <sup>H1</sup> | GmPRR12 <sup>H1</sup> | GmPRR13 <sup>H2</sup> | GmPRR14 <sup>H2</sup> |
| Liaodou15       | GmPRR1 <sup>H4</sup> | GmPRR2 <sup>H4</sup> | GmPRR3 <sup>H3</sup> | GmPRR4 <sup>H1</sup> | GmPRR5 <sup>H1</sup> | GmPRR6 <sup>H2</sup> | GmPRR7 <sup>H3</sup> | GmPRR8 <sup>H1</sup> | GmPRR9 <sup>H1</sup> | GmPRR10 <sup>H1</sup> | GmPRR11 <sup>H1</sup> | GmPRR12 <sup>H3</sup> | GmPRR13 <sup>H2</sup> | GmPRR14 <sup>H4</sup> |
| Yunyizao        | GmPRR1 <sup>H4</sup> | GmPRR2 <sup>H4</sup> | GmPRR3 <sup>H3</sup> | GmPRR4 <sup>H1</sup> | GmPRR5 <sup>H1</sup> | GmPRR6 <sup>H2</sup> | GmPRR7 <sup>H4</sup> | GmPRR8 <sup>H3</sup> | GmPRR9 <sup>H2</sup> | GmPRR10 <sup>H1</sup> | GmPRR11 <sup>H2</sup> | GmPRR12 <sup>H3</sup> | GmPRR13 <sup>H2</sup> | GmPRR14 <sup>H2</sup> |
| Baihuadou       | GmPRR1 <sup>H4</sup> | GmPRR2 <sup>H4</sup> | GmPRR3 <sup>H3</sup> | GmPRR4 <sup>H1</sup> | /                    | GmPRR6 <sup>H3</sup> | GmPRR7 <sup>H3</sup> | GmPRR8 <sup>H1</sup> | GmPRR9 <sup>H1</sup> | GmPRR10 <sup>H1</sup> | GmPRR11 <sup>H1</sup> | GmPRR12 <sup>H3</sup> | GmPRR13 <sup>H2</sup> | GmPRR14 <sup>H2</sup> |
| Dandou2         | GmPRR1 <sup>H4</sup> | GmPRR2 <sup>H4</sup> | GmPRR3 <sup>H3</sup> | GmPRR4 <sup>H1</sup> | GmPRR5 <sup>H1</sup> | GmPRR6 <sup>H3</sup> | GmPRR7 <sup>H3</sup> | GmPRR8 <sup>H2</sup> | GmPRR9 <sup>H1</sup> | GmPRR10 <sup>H2</sup> | GmPRR11 <sup>H1</sup> | GmPRR12 <sup>H3</sup> | GmPRR13 <sup>H1</sup> | GmPRR14 <sup>H3</sup> |
| Houzimao        | GmPRR1 <sup>H4</sup> | GmPRR2 <sup>H4</sup> | GmPRR3 <sup>H3</sup> | GmPRR4 <sup>H1</sup> | GmPRR5 <sup>H1</sup> | GmPRR6 <sup>H4</sup> | GmPRR7 <sup>H2</sup> | GmPRR8 <sup>H1</sup> | GmPRR9 <sup>H4</sup> | GmPRR10 <sup>H1</sup> | GmPRR11 <sup>H1</sup> | GmPRR12 <sup>H1</sup> | GmPRR13 <sup>H2</sup> | GmPRR14 <sup>H2</sup> |
| Tracy           | GmPRR1 <sup>H4</sup> | GmPRR2 <sup>H4</sup> | GmPRR3 <sup>H3</sup> | GmPRR4 <sup>H1</sup> | GmPRR5 <sup>H1</sup> | GmPRR6 <sup>H4</sup> | GmPRR7 <sup>H3</sup> | GmPRR8 <sup>H1</sup> | GmPRR9 <sup>H4</sup> | GmPRR10 <sup>H1</sup> | GmPRR11 <sup>H1</sup> | GmPRR12 <sup>H3</sup> | GmPRR13 <sup>H2</sup> | GmPRR14 <sup>H2</sup> |
| Guichun8        | GmPRR1 <sup>H4</sup> | GmPRR2 <sup>H4</sup> | GmPRR3 <sup>H3</sup> | GmPRR4 <sup>H1</sup> | /                    | GmPRR6 <sup>H4</sup> | GmPRR7 <sup>H3</sup> | GmPRR8 <sup>H3</sup> | GmPRR9 <sup>H1</sup> | GmPRR10 <sup>H1</sup> | GmPRR11 <sup>H2</sup> | GmPRR12 <sup>H1</sup> | GmPRR13 <sup>H2</sup> | GmPRR14 <sup>H2</sup> |
| Merit           | GmPRR1 <sup>H4</sup> | GmPRR2 <sup>H4</sup> | GmPRR3 <sup>H3</sup> | GmPRR4 <sup>H1</sup> | GmPRR5 <sup>H1</sup> | GmPRR6 <sup>H1</sup> | GmPRR7 <sup>H3</sup> | GmPRR8 <sup>H2</sup> | GmPRR9 <sup>H1</sup> | GmPRR10 <sup>H1</sup> | GmPRR11 <sup>H1</sup> | GmPRR12 <sup>H2</sup> | GmPRR13 <sup>H1</sup> | GmPRR14 <sup>H3</sup> |
| Taiwan75        | GmPRR1 <sup>H4</sup> | GmPRR2 <sup>H4</sup> | GmPRR3 <sup>H3</sup> | GmPRR4 <sup>H2</sup> | GmPRR5 <sup>H1</sup> | GmPRR6 <sup>H1</sup> | GmPRR7 <sup>H3</sup> | GmPRR8 <sup>H2</sup> | GmPRR9 <sup>H2</sup> | GmPRR10 <sup>H1</sup> | GmPRR11 <sup>H1</sup> | GmPRR12 <sup>H2</sup> | GmPRR13 <sup>H1</sup> | GmPRR14 <sup>H2</sup> |
| Nandou12        | GmPRR1 <sup>H4</sup> | GmPRR2 <sup>H4</sup> | GmPRR3 <sup>H3</sup> | GmPRR4 <sup>H2</sup> | GmPRR5 <sup>H1</sup> | GmPRR6 <sup>H2</sup> | GmPRR7 <sup>H2</sup> | GmPRR8 <sup>H1</sup> | GmPRR9 <sup>H2</sup> | GmPRR10 <sup>H3</sup> | GmPRR11 <sup>H2</sup> | GmPRR12 <sup>H1</sup> | GmPRR13 <sup>H2</sup> | GmPRR14 <sup>H2</sup> |
| Yudou8          | GmPRR1 <sup>H4</sup> | GmPRR2 <sup>H4</sup> | GmPRR3 <sup>H3</sup> | GmPRR4 <sup>H2</sup> | GmPRR5 <sup>H1</sup> | GmPRR6 <sup>H2</sup> | /                    | GmPRR8 <sup>H2</sup> | GmPRR9 <sup>H1</sup> | GmPRR10 <sup>H1</sup> | /                     | GmPRR12 <sup>H1</sup> | GmPRR13 <sup>H2</sup> | GmPRR14 <sup>H2</sup> |
| Xiangdou3       | GmPRR1 <sup>H4</sup> | GmPRR2 <sup>H4</sup> | GmPRR3 <sup>H3</sup> | GmPRR4 <sup>H2</sup> | GmPRR5 <sup>H1</sup> | GmPRR6 <sup>H3</sup> | GmPRR7 <sup>H3</sup> | GmPRR8 <sup>H1</sup> | GmPRR9 <sup>H3</sup> | GmPRR10 <sup>H1</sup> | GmPRR11 <sup>H1</sup> | GmPRR12 <sup>H3</sup> | GmPRR13 <sup>H1</sup> | GmPRR14 <sup>H2</sup> |
| Dandou1         | GmPRR1 <sup>H4</sup> | GmPRR2 <sup>H4</sup> | GmPRR3 <sup>H3</sup> | GmPRR4 <sup>H2</sup> | GmPRR5 <sup>H1</sup> | GmPRR6 <sup>H4</sup> | GmPRR7 <sup>H3</sup> | GmPRR8 <sup>H1</sup> | GmPRR9 <sup>H2</sup> | GmPRR10 <sup>H1</sup> | GmPRR11 <sup>H1</sup> | GmPRR12 <sup>H3</sup> | GmPRR13 <sup>H2</sup> | GmPRR14 <sup>H2</sup> |
| 77-14           | GmPRR1 <sup>H4</sup> | GmPRR2 <sup>H4</sup> | GmPRR3 <sup>H3</sup> | GmPRR4 <sup>H2</sup> | GmPRR5 <sup>H1</sup> | GmPRR6 <sup>H4</sup> | GmPRR7 <sup>H3</sup> | GmPRR8 <sup>H1</sup> | GmPRR9 <sup>H3</sup> | GmPRR10 <sup>H2</sup> | GmPRR11 <sup>H1</sup> | GmPRR12 <sup>H3</sup> | GmPRR13 <sup>H2</sup> | GmPRR14 <sup>H2</sup> |
| Lanxadaqingdou  | GmPRR1 <sup>H4</sup> | GmPRR2 <sup>H4</sup> | GmPRR3 <sup>H3</sup> | GmPRR4 <sup>H2</sup> | GmPRR5 <sup>H1</sup> | GmPRR6 <sup>H4</sup> | GmPRR7 <sup>H3</sup> | GmPRR8 <sup>H2</sup> | GmPRR9 <sup>H3</sup> | GmPRR10 <sup>H1</sup> | GmPRR11 <sup>H1</sup> | GmPRR12 <sup>H3</sup> | GmPRR13 <sup>H2</sup> | GmPRR14 <sup>H2</sup> |
| Yulindahuangdou | GmPRR1 <sup>H4</sup> | GmPRR2 <sup>H4</sup> | GmPRR3 <sup>H3</sup> | GmPRR4 <sup>H2</sup> | GmPRR5 <sup>H1</sup> | GmPRR6 <sup>H4</sup> | GmPRR7 <sup>H3</sup> | GmPRR8 <sup>H2</sup> | GmPRR9 <sup>H4</sup> | GmPRR10 <sup>H1</sup> | GmPRR11 <sup>H2</sup> | GmPRR12 <sup>H4</sup> | GmPRR13 <sup>H2</sup> | GmPRR14 <sup>H2</sup> |
| Qiudou1         | GmPRR1 <sup>H4</sup> | GmPRR2 <sup>H4</sup> | GmPRR3 <sup>H3</sup> | GmPRR4 <sup>H2</sup> | GmPRR5 <sup>H1</sup> | GmPRR6 <sup>H5</sup> | GmPRR7 <sup>H2</sup> | /                    | GmPRR9 <sup>H3</sup> | GmPRR10 <sup>H3</sup> | GmPRR11 <sup>H2</sup> | /                     | GmPRR13 <sup>H2</sup> | /                     |
| Heibiqing       | GmPRR1 <sup>H4</sup> | GmPRR2 <sup>H4</sup> | GmPRR3 <sup>H3</sup> | GmPRR4 <sup>H2</sup> | GmPRR5 <sup>H3</sup> | GmPRR6 <sup>H3</sup> | GmPRR7 <sup>H4</sup> | GmPRR8 <sup>H2</sup> | GmPRR9 <sup>H1</sup> | GmPRR10 <sup>H3</sup> | GmPRR11 <sup>H1</sup> | GmPRR12 <sup>H3</sup> | GmPRR13 <sup>H2</sup> | GmPRR14 <sup>H2</sup> |
| Liuyuehuang     | GmPRR1 <sup>H4</sup> | GmPRR2 <sup>H4</sup> | GmPRR3 <sup>H3</sup> | GmPRR4 <sup>H2</sup> | GmPRR5 <sup>H3</sup> | GmPRR6 <sup>H3</sup> | GmPRR7 <sup>H3</sup> | GmPRR8 <sup>H2</sup> | GmPRR9 <sup>H4</sup> | GmPRR10 <sup>H1</sup> | GmPRR11 <sup>H2</sup> | GmPRR12 <sup>H3</sup> | GmPRR13 <sup>H2</sup> | GmPRR14 <sup>H2</sup> |

| Variety            | GmPRR1               | GmPRR2               | GmPRR3               | GmPRR4               | GmPRR5               | GmPRR6               | GmPRR7               | GmPRR8               | GmPRR9               | GmPRR10               | GmPRR11               | GmPRR12               | GmPRR13               | GmPRR14               |
|--------------------|----------------------|----------------------|----------------------|----------------------|----------------------|----------------------|----------------------|----------------------|----------------------|-----------------------|-----------------------|-----------------------|-----------------------|-----------------------|
| Yuejin5            | GmPRR1 <sup>H4</sup> | GmPRR2 <sup>H4</sup> | GmPRR3 <sup>H3</sup> | GmPRR4 <sup>H2</sup> | GmPRR5 <sup>H4</sup> | GmPRR6 <sup>H1</sup> | GmPRR7 <sup>H3</sup> | GmPRR8 <sup>H1</sup> | GmPRR9 <sup>H1</sup> | GmPRR10 <sup>H1</sup> | GmPRR11 <sup>H2</sup> | GmPRR12 <sup>H3</sup> | GmPRR13 <sup>H2</sup> | GmPRR14 <sup>H2</sup> |
| Jidou17            | GmPRR1 <sup>H4</sup> | GmPRR2 <sup>H4</sup> | GmPRR3 <sup>H3</sup> | GmPRR4 <sup>H2</sup> | GmPRR5 <sup>H4</sup> | GmPRR6 <sup>H2</sup> | GmPRR7 <sup>H3</sup> | GmPRR8 <sup>H2</sup> | GmPRR9 <sup>H1</sup> | GmPRR10 <sup>H1</sup> | GmPRR11 <sup>H1</sup> | GmPRR12 <sup>H1</sup> | GmPRR13 <sup>H2</sup> | GmPRR14 <sup>H2</sup> |
| Youbian30          | GmPRR1 <sup>H4</sup> | GmPRR2 <sup>H4</sup> | GmPRR3 <sup>H3</sup> | GmPRR4 <sup>H2</sup> | GmPRR5 <sup>H4</sup> | GmPRR6 <sup>H4</sup> | GmPRR7 <sup>H2</sup> | GmPRR8 <sup>H2</sup> | GmPRR9 <sup>H1</sup> | GmPRR10 <sup>H1</sup> | GmPRR11 <sup>H2</sup> | GmPRR12 <sup>H1</sup> | GmPRR13 <sup>H2</sup> | GmPRR14 <sup>H2</sup> |
| Guichun1           | GmPRR1 <sup>H4</sup> | GmPRR2 <sup>H4</sup> | GmPRR3 <sup>H3</sup> | GmPRR4 <sup>H2</sup> | GmPRR5 <sup>H4</sup> | GmPRR6 <sup>H4</sup> | /                    | GmPRR8 <sup>H3</sup> | GmPRR9 <sup>H1</sup> | GmPRR10 <sup>H1</sup> | GmPRR11 <sup>H2</sup> | GmPRR12 <sup>H1</sup> | GmPRR13 <sup>H2</sup> | GmPRR14 <sup>H2</sup> |
| Jinningdahuangdou  | GmPRR1 <sup>H4</sup> | GmPRR2 <sup>H4</sup> | GmPRR3 <sup>H3</sup> | GmPRR4 <sup>H2</sup> | GmPRR5 <sup>H4</sup> | GmPRR6 <sup>H4</sup> | GmPRR7 <sup>H3</sup> | GmPRR8 <sup>H1</sup> | GmPRR9 <sup>H3</sup> | GmPRR10 <sup>H1</sup> | GmPRR11 <sup>H1</sup> | GmPRR12 <sup>H3</sup> | GmPRR13 <sup>H2</sup> | /                     |
| Jupiter            | GmPRR1 <sup>H4</sup> | GmPRR2 <sup>H4</sup> | GmPRR3 <sup>H3</sup> | GmPRR4 <sup>H2</sup> | GmPRR5 <sup>H4</sup> | GmPRR6 <sup>H4</sup> | GmPRR7 <sup>H3</sup> | GmPRR8 <sup>H1</sup> | GmPRR9 <sup>H4</sup> | GmPRR10 <sup>H3</sup> | GmPRR11 <sup>H1</sup> | GmPRR12 <sup>H3</sup> | GmPRR13 <sup>H2</sup> | GmPRR14 <sup>H2</sup> |
| Zhonghuang13       | GmPRR1 <sup>H4</sup> | GmPRR2 <sup>H4</sup> | GmPRR3 <sup>H3</sup> | GmPRR4 <sup>H2</sup> | GmPRR5 <sup>H4</sup> | GmPRR6 <sup>H4</sup> | GmPRR7 <sup>H3</sup> | GmPRR8 <sup>H3</sup> | GmPRR9 <sup>H1</sup> | GmPRR10 <sup>H1</sup> | GmPRR11 <sup>H1</sup> | GmPRR12 <sup>H4</sup> | GmPRR13 <sup>H2</sup> | GmPRR14 <sup>H2</sup> |
| Hedou13            | GmPRR1 <sup>H4</sup> | GmPRR2 <sup>H4</sup> | GmPRR3 <sup>H3</sup> | GmPRR4 <sup>H2</sup> | GmPRR5 <sup>H4</sup> | GmPRR6 <sup>H4</sup> | GmPRR7 <sup>H3</sup> | GmPRR8 <sup>H3</sup> | GmPRR9 <sup>H1</sup> | GmPRR10 <sup>H1</sup> | GmPRR11 <sup>H1</sup> | GmPRR12 <sup>H4</sup> | GmPRR13 <sup>H2</sup> | GmPRR14 <sup>H2</sup> |
| Zigongdongdou      | GmPRR1 <sup>H4</sup> | GmPRR2 <sup>H4</sup> | GmPRR3 <sup>H3</sup> | GmPRR4 <sup>H2</sup> | GmPRR5 <sup>H4</sup> | 6-2                  | GmPRR7 <sup>H3</sup> | GmPRR8 <sup>H3</sup> | GmPRR9 <sup>H3</sup> | GmPRR10 <sup>H2</sup> | GmPRR11 <sup>H2</sup> | GmPRR12 <sup>H3</sup> | GmPRR13 <sup>H2</sup> | GmPRR14 <sup>H3</sup> |
| Juhuangdadou       | GmPRR1 <sup>H4</sup> | GmPRR2 <sup>H4</sup> | GmPRR3 <sup>H4</sup> | GmPRR4 <sup>H2</sup> | GmPRR5 <sup>H4</sup> | GmPRR6 <sup>H4</sup> | GmPRR7 <sup>H3</sup> | GmPRR8 <sup>H3</sup> | GmPRR9 <sup>H4</sup> | GmPRR10 <sup>H1</sup> | GmPRR11 <sup>H2</sup> | GmPRR12 <sup>H4</sup> | GmPRR13 <sup>H2</sup> | GmPRR14 <sup>H2</sup> |
| Wuhuasiyuehuang    | GmPRR1 <sup>H4</sup> | GmPRR2 <sup>H4</sup> | GmPRR3 <sup>H4</sup> | GmPRR4 <sup>H2</sup> | GmPRR5 <sup>H4</sup> | GmPRR6 <sup>H4</sup> | GmPRR7 <sup>H3</sup> | GmPRR8 <sup>H3</sup> | GmPRR9 <sup>H4</sup> | GmPRR10 <sup>H1</sup> | GmPRR11 <sup>H2</sup> | GmPRR12 <sup>H4</sup> | GmPRR13 <sup>H2</sup> | GmPRR14 <sup>H2</sup> |
| Daoshuihuang       | GmPRR1 <sup>H4</sup> | GmPRR2 <sup>H4</sup> | GmPRR3 <sup>H4</sup> | GmPRR4 <sup>H2</sup> | GmPRR5 <sup>H4</sup> | GmPRR6 <sup>H4</sup> | GmPRR7 <sup>H3</sup> | GmPRR8 <sup>H3</sup> | GmPRR9 <sup>H4</sup> | GmPRR10 <sup>H1</sup> | GmPRR11 <sup>H2</sup> | GmPRR12 <sup>H4</sup> | GmPRR13 <sup>H2</sup> | GmPRR14 <sup>H2</sup> |
| Shangraodaqingsi   | GmPRR1 <sup>H4</sup> | GmPRR2 <sup>H4</sup> | GmPRR3 <sup>H5</sup> | GmPRR4 <sup>H1</sup> | GmPRR5 <sup>H4</sup> | GmPRR6 <sup>H5</sup> | 7-2                  | GmPRR8 <sup>H2</sup> | GmPRR9 <sup>H3</sup> | GmPRR10 <sup>H3</sup> | GmPRR11 <sup>H2</sup> | GmPRR12 <sup>H3</sup> | GmPRR13 <sup>H2</sup> | GmPRR14 <sup>H2</sup> |
| Baishuidou         | GmPRR1 <sup>H4</sup> | GmPRR2 <sup>H4</sup> | /                    | /                    | GmPRR5 <sup>H1</sup> | /                    | /                    | /                    | /                    | /                     | GmPRR11 <sup>H2</sup> | GmPRR12 <sup>H3</sup> | GmPRR13 <sup>H2</sup> | GmPRR14 <sup>H2</sup> |
| Beeson             | GmPRR1 <sup>H4</sup> | GmPRR2 <sup>H5</sup> | GmPRR3 <sup>H1</sup> | GmPRR4 <sup>H1</sup> | GmPRR5 <sup>H1</sup> | GmPRR6 <sup>H1</sup> | GmPRR7 <sup>H3</sup> | GmPRR8 <sup>H2</sup> | GmPRR9 <sup>H1</sup> | GmPRR10 <sup>H1</sup> | GmPRR11 <sup>H1</sup> | GmPRR12 <sup>H3</sup> | GmPRR13 <sup>H1</sup> | GmPRR14 <sup>H2</sup> |
| Jindou19           | GmPRR1 <sup>H4</sup> | GmPRR2 <sup>H5</sup> | GmPRR3 <sup>H2</sup> | GmPRR4 <sup>H1</sup> | GmPRR5 <sup>H1</sup> | GmPRR6 <sup>H3</sup> | GmPRR7 <sup>H3</sup> | GmPRR8 <sup>H1</sup> | GmPRR9 <sup>H1</sup> | GmPRR10 <sup>H1</sup> | GmPRR11 <sup>H2</sup> | GmPRR12 <sup>H3</sup> | GmPRR13 <sup>H1</sup> | GmPRR14 <sup>H3</sup> |
| Tiefeng31          | GmPRR1 <sup>H4</sup> | GmPRR2 <sup>H5</sup> | GmPRR3 <sup>H3</sup> | GmPRR4 <sup>H1</sup> | GmPRR5 <sup>H1</sup> | GmPRR6 <sup>H2</sup> | GmPRR7 <sup>H3</sup> | GmPRR8 <sup>H1</sup> | GmPRR9 <sup>H1</sup> | GmPRR10 <sup>H1</sup> | GmPRR11 <sup>H1</sup> | GmPRR12 <sup>H2</sup> | GmPRR13 <sup>H1</sup> | GmPRR14 <sup>H2</sup> |
| Centennial         | GmPRR1 <sup>H4</sup> | GmPRR2 <sup>H5</sup> | GmPRR3 <sup>H3</sup> | GmPRR4 <sup>H2</sup> | GmPRR5 <sup>H1</sup> | GmPRR6 <sup>H4</sup> | GmPRR7 <sup>H3</sup> | GmPRR8 <sup>H1</sup> | GmPRR9 <sup>H4</sup> | GmPRR10 <sup>H1</sup> | GmPRR11 <sup>H1</sup> | GmPRR12 <sup>H1</sup> | GmPRR13 <sup>H2</sup> | GmPRR14 <sup>H2</sup> |
| Wenfeng7           | GmPRR1 <sup>H4</sup> | GmPRR2 <sup>H6</sup> | GmPRR3 <sup>H2</sup> | GmPRR4 <sup>H1</sup> | GmPRR5 <sup>H1</sup> | GmPRR6 <sup>H2</sup> | GmPRR7 <sup>H4</sup> | GmPRR8 <sup>H3</sup> | GmPRR9 <sup>H1</sup> | GmPRR10 <sup>H1</sup> | GmPRR11 <sup>H2</sup> | GmPRR12 <sup>H1</sup> | GmPRR13 <sup>H2</sup> | GmPRR14 <sup>H2</sup> |
| Jindou3            | GmPRR1 <sup>H4</sup> | GmPRR2 <sup>H6</sup> | GmPRR3 <sup>H2</sup> | GmPRR4 <sup>H1</sup> | GmPRR5 <sup>H1</sup> | GmPRR6 <sup>H2</sup> | GmPRR7 <sup>H3</sup> | GmPRR8 <sup>H3</sup> | GmPRR9 <sup>H3</sup> | GmPRR10 <sup>H1</sup> | GmPRR11 <sup>H1</sup> | GmPRR12 <sup>H3</sup> | GmPRR13 <sup>H1</sup> | GmPRR14 <sup>H3</sup> |
| Naiyinheidou       | GmPRR1 <sup>H4</sup> | GmPRR2 <sup>H6</sup> | GmPRR3 <sup>H2</sup> | GmPRR4 <sup>H1</sup> | GmPRR5 <sup>H4</sup> | GmPRR6 <sup>H2</sup> | GmPRR7 <sup>H4</sup> | GmPRR8 <sup>H3</sup> | GmPRR9 <sup>H1</sup> | GmPRR10 <sup>H3</sup> | GmPRR11 <sup>H2</sup> | GmPRR12 <sup>H1</sup> | GmPRR13 <sup>H2</sup> | GmPRR14 <sup>H3</sup> |
| Chenliuniumaohuang | GmPRR1 <sup>H4</sup> | GmPRR2 <sup>H6</sup> | GmPRR3 <sup>H2</sup> | GmPRR4 <sup>H2</sup> | GmPRR5 <sup>H4</sup> | GmPRR6 <sup>H4</sup> | GmPRR7 <sup>H4</sup> | GmPRR8 <sup>H1</sup> | GmPRR9 <sup>H4</sup> | GmPRR10 <sup>H1</sup> | GmPRR11 <sup>H1</sup> | GmPRR12 <sup>H3</sup> | GmPRR13 <sup>H2</sup> | GmPRR14 <sup>H2</sup> |
| Bahong1            | GmPRR1 <sup>H4</sup> | GmPRR2 <sup>H6</sup> | GmPRR3 <sup>H3</sup> | GmPRR4 <sup>H1</sup> | GmPRR5 <sup>H1</sup> | GmPRR6 <sup>H3</sup> | GmPRR7 <sup>H4</sup> | GmPRR8 <sup>H3</sup> | GmPRR9 <sup>H1</sup> | /                     | GmPRR11 <sup>H2</sup> | GmPRR12 <sup>H3</sup> | GmPRR13 <sup>H2</sup> | GmPRR14 <sup>H5</sup> |
| Hengyangbayueqing  | GmPRR1 <sup>H4</sup> | GmPRR2 <sup>H6</sup> | GmPRR3 <sup>H3</sup> | GmPRR4 <sup>H1</sup> | GmPRR5 <sup>H1</sup> | GmPRR6 <sup>H4</sup> | GmPRR7 <sup>H2</sup> | GmPRR8 <sup>H1</sup> | GmPRR9 <sup>H3</sup> | GmPRR10 <sup>H1</sup> | GmPRR11 <sup>H1</sup> | GmPRR12 <sup>H3</sup> | GmPRR13 <sup>H2</sup> | GmPRR14 <sup>H2</sup> |

| Variety        | GmPRR1               | GmPRR2               | GmPRR3               | GmPRR4               | GmPRR5               | GmPRR6               | GmPRR7               | GmPRR8               | GmPRR9               | GmPRR10               | GmPRR11               | GmPRR12               | GmPRR13               | GmPRR14               |
|----------------|----------------------|----------------------|----------------------|----------------------|----------------------|----------------------|----------------------|----------------------|----------------------|-----------------------|-----------------------|-----------------------|-----------------------|-----------------------|
| Miquanhuangdou | GmPRR1 <sup>H4</sup> | GmPRR2 <sup>H6</sup> | GmPRR3 <sup>H3</sup> | GmPRR4 <sup>H2</sup> | GmPRR5 <sup>H1</sup> | GmPRR6 <sup>H1</sup> | GmPRR7 <sup>H1</sup> | GmPRR8 <sup>H3</sup> | GmPRR9 <sup>H1</sup> | GmPRR10 <sup>H1</sup> | GmPRR11 <sup>H1</sup> | GmPRR12 <sup>H1</sup> | GmPRR13 <sup>H2</sup> | GmPRR14 <sup>H3</sup> |
| Yanhuang1      | GmPRR1 <sup>H4</sup> | GmPRR2 <sup>H6</sup> | GmPRR3 <sup>H3</sup> | GmPRR4 <sup>H2</sup> | GmPRR5 <sup>H1</sup> | GmPRR6 <sup>H4</sup> | GmPRR7 <sup>H3</sup> | GmPRR8 <sup>H3</sup> | /                    | GmPRR10 <sup>H1</sup> | GmPRR11 <sup>H2</sup> | GmPRR12 <sup>H3</sup> | GmPRR13 <sup>H3</sup> | GmPRR14 <sup>H2</sup> |
| Ludou4         | GmPRR1 <sup>H4</sup> | GmPRR2 <sup>H6</sup> | GmPRR3 <sup>H3</sup> | GmPRR4 <sup>H2</sup> | GmPRR5 <sup>H1</sup> | GmPRR6 <sup>H4</sup> | GmPRR7 <sup>H3</sup> | /                    | GmPRR9 <sup>H1</sup> | GmPRR10 <sup>H1</sup> | GmPRR11 <sup>H2</sup> | GmPRR12 <sup>H4</sup> | /                     | GmPRR14 <sup>H2</sup> |
| Weiqingdou     | GmPRR1 <sup>H4</sup> | GmPRR2 <sup>H6</sup> | GmPRR3 <sup>H3</sup> | GmPRR4 <sup>H2</sup> | GmPRR5 <sup>H1</sup> | GmPRR6 <sup>H4</sup> | GmPRR7 <sup>H3</sup> | GmPRR8 <sup>H1</sup> | GmPRR9 <sup>H1</sup> | GmPRR10 <sup>H1</sup> | GmPRR11 <sup>H1</sup> | GmPRR12 <sup>H3</sup> | GmPRR13 <sup>H2</sup> | GmPRR14 <sup>H2</sup> |
| Yuejin4        | GmPRR1 <sup>H4</sup> | GmPRR2 <sup>H6</sup> | GmPRR3 <sup>H3</sup> | GmPRR4 <sup>H2</sup> | GmPRR5 <sup>H1</sup> | GmPRR6 <sup>H4</sup> | GmPRR7 <sup>H4</sup> | GmPRR8 <sup>H3</sup> | GmPRR9 <sup>H1</sup> | GmPRR10 <sup>H1</sup> | GmPRR11 <sup>H2</sup> | GmPRR12 <sup>H3</sup> | GmPRR13 <sup>H3</sup> | GmPRR14 <sup>H2</sup> |
| Heinong48      | GmPRR1 <sup>H4</sup> | /                    | GmPRR3 <sup>H1</sup> | GmPRR4 <sup>H1</sup> | GmPRR5 <sup>H1</sup> | GmPRR6 <sup>H2</sup> | /                    | GmPRR8 <sup>H1</sup> | GmPRR9 <sup>H1</sup> | GmPRR10 <sup>H1</sup> | GmPRR11 <sup>H1</sup> | GmPRR12 <sup>H1</sup> | GmPRR13 <sup>H2</sup> | GmPRR14 <sup>H2</sup> |
| Jiti5          | GmPRR1 <sup>H4</sup> | /                    | GmPRR3 <sup>H2</sup> | GmPRR4 <sup>H1</sup> | GmPRR5 <sup>H1</sup> | GmPRR6 <sup>H1</sup> | GmPRR7 <sup>H3</sup> | GmPRR8 <sup>H1</sup> | GmPRR9 <sup>H1</sup> | GmPRR10 <sup>H1</sup> | GmPRR11 <sup>H1</sup> | GmPRR12 <sup>H3</sup> | GmPRR13 <sup>H1</sup> | GmPRR14 <sup>H2</sup> |
| Ludou11        | GmPRR1 <sup>H4</sup> | /                    | GmPRR3 <sup>H2</sup> | GmPRR4 <sup>H1</sup> | GmPRR5 <sup>H1</sup> | GmPRR6 <sup>H4</sup> | GmPRR7 <sup>H3</sup> | /                    | GmPRR9 <sup>H1</sup> | GmPRR10 <sup>H1</sup> | GmPRR11 <sup>H2</sup> | GmPRR12 <sup>H3</sup> | GmPRR13 <sup>H1</sup> | GmPRR14 <sup>H2</sup> |
| Dian86-4       | GmPRR1 <sup>H4</sup> | /                    | GmPRR3 <sup>H1</sup> | /                    | GmPRR5 <sup>H1</sup> | GmPRR6 <sup>H4</sup> | GmPRR7 <sup>H3</sup> | GmPRR8 <sup>H1</sup> | GmPRR9 <sup>H3</sup> | GmPRR10 <sup>H1</sup> | GmPRR11 <sup>H1</sup> | GmPRR12 <sup>H3</sup> | GmPRR13 <sup>H2</sup> | GmPRR14 <sup>H3</sup> |
| PI 548655      | GmPRR1 <sup>H5</sup> | GmPRR2 <sup>H4</sup> | GmPRR3 <sup>H2</sup> | GmPRR4 <sup>H2</sup> | GmPRR5 <sup>H1</sup> | GmPRR6 <sup>H4</sup> | GmPRR7 <sup>H3</sup> | GmPRR8 <sup>H1</sup> | GmPRR9 <sup>H1</sup> | GmPRR10 <sup>H1</sup> | GmPRR11 <sup>H2</sup> | GmPRR12 <sup>H3</sup> | GmPRR13 <sup>H2</sup> | GmPRR14 <sup>H2</sup> |
| PI 548660      | GmPRR1 <sup>H5</sup> | GmPRR2 <sup>H4</sup> | GmPRR3 <sup>H3</sup> | GmPRR4 <sup>H2</sup> | GmPRR5 <sup>H1</sup> | GmPRR6 <sup>H4</sup> | GmPRR7 <sup>H3</sup> | GmPRR8 <sup>H1</sup> | GmPRR9 <sup>H4</sup> | GmPRR10 <sup>H1</sup> | GmPRR11 <sup>H2</sup> | GmPRR12 <sup>H1</sup> | GmPRR13 <sup>H2</sup> | GmPRR14 <sup>H2</sup> |
| Braxton        | GmPRR1 <sup>H5</sup> | GmPRR2 <sup>H4</sup> | GmPRR3 <sup>H3</sup> | GmPRR4 <sup>H2</sup> | GmPRR5 <sup>H1</sup> | GmPRR6 <sup>H4</sup> | GmPRR7 <sup>H3</sup> | GmPRR8 <sup>H1</sup> | GmPRR9 <sup>H4</sup> | GmPRR10 <sup>H1</sup> | GmPRR11 <sup>H2</sup> | GmPRR12 <sup>H1</sup> | GmPRR13 <sup>H2</sup> | GmPRR14 <sup>H2</sup> |
| Cutler         | GmPRR1 <sup>H5</sup> | GmPRR2 <sup>H5</sup> | GmPRR3 <sup>H2</sup> | GmPRR4 <sup>H1</sup> | GmPRR5 <sup>H1</sup> | GmPRR6 <sup>H2</sup> | GmPRR7 <sup>H3</sup> | GmPRR8 <sup>H1</sup> | GmPRR9 <sup>H1</sup> | GmPRR10 <sup>H1</sup> | GmPRR11 <sup>H1</sup> | GmPRR12 <sup>H1</sup> | GmPRR13 <sup>H1</sup> | GmPRR14 <sup>H2</sup> |
| Dare           | GmPRR1 <sup>H5</sup> | GmPRR2 <sup>H5</sup> | GmPRR3 <sup>H2</sup> | GmPRR4 <sup>H2</sup> | GmPRR5 <sup>H1</sup> | GmPRR6 <sup>H1</sup> | GmPRR7 <sup>H3</sup> | GmPRR8 <sup>H1</sup> | GmPRR9 <sup>H1</sup> | GmPRR10 <sup>H1</sup> | GmPRR11 <sup>H1</sup> | GmPRR12 <sup>H3</sup> | GmPRR13 <sup>H2</sup> | GmPRR14 <sup>H4</sup> |
| Hood           | GmPRR1 <sup>H5</sup> | GmPRR2 <sup>H5</sup> | GmPRR3 <sup>H3</sup> | GmPRR4 <sup>H1</sup> | GmPRR5 <sup>H1</sup> | GmPRR6 <sup>H1</sup> | GmPRR7 <sup>H3</sup> | GmPRR8 <sup>H2</sup> | GmPRR9 <sup>H1</sup> | GmPRR10 <sup>H1</sup> | GmPRR11 <sup>H2</sup> | GmPRR12 <sup>H1</sup> | GmPRR13 <sup>H1</sup> | GmPRR14 <sup>H2</sup> |
| PI 548663      | GmPRR1 <sup>H5</sup> | GmPRR2 <sup>H5</sup> | GmPRR3 <sup>H3</sup> | GmPRR4 <sup>H2</sup> | GmPRR5 <sup>H1</sup> | GmPRR6 <sup>H4</sup> | GmPRR7 <sup>H3</sup> | GmPRR8 <sup>H1</sup> | GmPRR9 <sup>H4</sup> | GmPRR10 <sup>H1</sup> | GmPRR11 <sup>H1</sup> | GmPRR12 <sup>H1</sup> | GmPRR13 <sup>H2</sup> | GmPRR14 <sup>H2</sup> |

\* Each line in the table represents the division of different haplotype combinations. "/" represents that the loci in *GmPRRs* of the variety has not been detected.

**Supplementary Table S4.** Primer sequences used for qRT-PCR analysis of *GmPRRs*

| <b>Gene name</b> | <b>Forward primer sequence (5'-3')</b> | <b>Reverse primer sequence (5'-3')</b> |
|------------------|----------------------------------------|----------------------------------------|
| <i>GmPRR1</i>    | ACAAGGGTTCGATGCAGACC                   | TTCGACAAGCAAGACCCGAA                   |
| <i>GmPRR2</i>    | AGCAACTTGGAAGGGGTTGT                   | ATGCCTCTCCATTTTCCCGT                   |
| <i>GmPRR3</i>    | TGACCCTGTCGGTAACATGC                   | CGTGCTTGCCTCACCATTTT                   |
| <i>GmPRR4</i>    | GCGCATGCTTGGACTTGTAG                   | CAGCAGCAATGGTGGCAATA                   |
| <i>GmPRR5</i>    | CAGCTTCAGAGGGCAAGCAT                   | GGATGCACTTGACGCACAAA                   |
| <i>GmPRR6</i>    | GAATGTGGGCCTGATGTGGA                   | ACTTCCATCCCAACATGCGT                   |
| <i>GmPRR7</i>    | ATCCAAGAACGCCCCAGATG                   | GCCAGTCTTTTCCGGCTTTG                   |
| <i>GmPRR8</i>    | GCAACAATTCTGGCACCACC                   | GTGGAGCAGCAGTAGCCATT                   |
| <i>GmPRR9</i>    | AAGTTGGCAGTCCTCATCCG                   | GTCGCATGCACCCATCTACT                   |
| <i>GmPRR10</i>   | GAAAGTGCGACCCTCACCAG                   | TCTGAGTGCCACTTCCATTGT                  |
| <i>GmPRR11</i>   | CACAGCCTCAAGGGGCAATA                   | ACAATTGCGAAGCAGTGCAG                   |
| <i>GmPRR12</i>   | TGCATGGATGCAATGCTGAG                   | GCTTGTTTACCTGAGCTGCC                   |
| <i>GmPRR13</i>   | GTCAACAGAAAACGGCTCGC                   | AGTGGAAGCAGGTTGTCCAT                   |
| <i>GmPRR14</i>   | TGGAGAAGGCACGCCATAAG                   | CCAAAAATGGCGATGGGCAA                   |
| <i>GmActin</i>   | CGGTGGTTCTATCTTGGCATC                  | GTCTTTCGCTTCAATAACCCTA                 |
